# Supplementary material for: Scaling of thermal tolerance with body mass and genome size in ectotherms: a comparison between water- and air-breathers
Source: Philos Trans R Soc Lond B Biol Sci. 2019 Jun 17;374(1778):20190035. doi: 10.1098/rstb.2019.0035 (PMC6606457; doi:10.1098/rstb.2019.0035)
Supplement: MetaData [file rstb20190035supp3.csv]

Column_name	Description	Units/Categories
class	Class of study species	NA
order	Order of study species	NA
family	Family of study species	NA
species	Species name according to the article	NA
taxa	Taxonomic group of study species	amph (amphibian), arac (arachnid), col (collembola), crust (crustacean), fish, insect, rept (reptiles)
latitude	Latitude where individuals were collected	decimal degrees
abs_latitude	Absolute latitude where individuals were collected	decimal degrees
longitude	Longitude where individuals were collected	decimal degrees
life_stage	Life stage of tested individual	adult, non-adult
habitat	Habitat where individuals were collected	aquatic, intertidal, terrestrial
breathing_mode	Breathing mode of study species	air, water
ctmax	Measured value of critical thermal maximum	In Celcius degrees
ctmin	Measured value of critical thermal minimum	In Celcius degrees
body_mass	Individual body mass according to the paper	grams, in log10-scale
time_ctmax	Exposure duration for the ctmax trial	minutes, in log10-scale
time_ctmin	Exposure duration for the ctmin trial	minutes, in log10-scale
reference	Primary reference of thermal limits ans their associated data (e.g. ctmax, ctmin, latitude, etc)	see Leiva_et_al_References_PhilTransB.docx
