# Supplementary material for: Scaling of thermal tolerance with body mass and genome size in ectotherms: a comparison between water- and air-breathers
Source: Philos Trans R Soc Lond B Biol Sci. 2019 Jun 17;374(1778):20190035. doi: 10.1098/rstb.2019.0035 (PMC6606457; doi:10.1098/rstb.2019.0035)
Supplement: Raw Data [file rstb20190035supp2.csv]

class	order	family	species	taxa	latitude	abs_latitude	longitude	life_stage	habitat	breathing_mode	ctmax	ctmin	body_mass	time_ctmax	time_ctmin	reference
Actinopterygii	Clupeiformes	Sparidae	Acanthoparus schlegeli	fish	35.18	35.18	140.35	Adult	Aquatic	Water	39.3	NA	1.662757832	2.093759132	NA	[1]
Actinopterygii	Acipenseriformes	Acipenseridae	Acipenser brevirostrum	fish	32.89	32.89	-84.67	Non-adult	Aquatic	Water	35.1	NA	1.250420002	2.041392685	NA	[2]
Actinopterygii	Acipenseriformes	Acipenseridae	Acipenser medirostris	fish	41.53	41.53	-124.05	Non-adult	Aquatic	Water	34.5	NA	1.77815125	1.713210443	NA	[2]
Insecta	Coleoptera	Aphodiidea	Acrossus depressus	insect	54.2	54.2	-2.48	Adult	Terrestrial	Air	44.32	1.46	-1.076814677	1.456973014	1.43264866	[3]
Actinopterygii	Perciformes	Cichlidae	Aequidens pallidus	fish	-2.88	2.88	-59.96	Adult	Aquatic	Water	38.38	NA	0.086359831	2.922336131	NA	[3]
Insecta	Coleoptera	Dytiscidae	Agabus bipustulatus	insect	50.4	50.4	-4.28	Adult	Aquatic	Air	37.9	NA	-1.135884633	2.047664195	NA	[4]
Insecta	Coleoptera	Dytiscidae	Agabus brunneus	insect	36.34	36.34	-5.61	Adult	Aquatic	Air	46.4	-8.6	-1.380384994	1.421603927	1.501059262	[4]
Insecta	Coleoptera	Dytiscidae	Agabus didymus	insect	38.21	38.21	-2.45	Adult	Aquatic	Air	44.8	-9.2	-1.409492538	1.385606274	1.472756449	[4]
Insecta	Coleoptera	Dytiscidae	Agabus ramblae	insect	37.71	37.71	-1.9	Adult	Aquatic	Air	45.1	-6.8	-1.458920232	1.485721426	1.328379603	[4]
Insecta	Coleoptera	Dytiscidae	Agabus rufulus	insect	40.47	40.47	8.53	Adult	Aquatic	Air	44.3	-8	-1.369165482	1.474216264	1.352182518	[4]
Insecta	Hymenoptera	Halictidae	Agapostemon virescens	insect	35.8	35.8	-76.68	Adult	Terrestrial	Air	44.62	NA	-1.421870646	1.593728999	NA	[4]
Insecta	Plecoptera	Perlidae	Agnetina capitata	insect	36.22	36.22	-94.67	Non-adult	Aquatic	Water	31.49	NA	-1.227995136	1.629589468	NA	[4]
Insecta	Coleoptera	Aphodiidea	Agrilus ater	insect	54.2	54.2	-2.48	Adult	Terrestrial	Air	44.36	0.2	-1.542195073	1.458184436	1.471291711	[3]
Actinopterygii	Albuniformes	Albulidae	Albula vulpes	fish	24.83	24.83	-76.34	Adult	Aquatic	Water	37.9	NA	3.091814628	1.58546073	NA	[3]
Actinopterygii	Perciformes	Cichlidae	Alcolapia grahami	fish	-2.06	2.06	36.232	Adult	Aquatic	Water	45.6	17.6	0.472756449	1.230448921	1.882714228	[3]
Reptilia	Squamata	Gymnophthalmidae	Alopoglossus angulatus	rept	-2.95	2.95	-59.91	Adult	Terrestrial	Air	37.2	9	0.08278537	1.631443769	1.84509804	[3]
Actinopterygii	Siluriformes	Ictaluridae	Ameiurus melas	fish	39	39	-91	Adult	Aquatic	Water	38.1	NA	0.041392685	2.852336449	NA	[5]
Actinopterygii	Siluriformes	Ictaluridae	Ameiurus natalis	fish	32.83	32.83	-110.71	Adult	Aquatic	Water	38	NA	2.340444115	1.812913357	NA	[3]
Reptilia	Squamata	Teiidae	Ameiva ameiva	rept	-2.95	2.95	-59.91	Adult	Terrestrial	Air	46.1	11	1.61210343	1.894316063	1.792391689	[3]
Actinopterygii	Perciformes	Pomacentridae	Amphiprion ocellaris	fish	23	23	-106	Adult	Aquatic	Water	36	14.8	0.204119983	0	0.716003344	[6]
Actinopterygii	Perciformes	Ananbantidae	Anabas testudineus	fish	19.14	19.14	72.91	Adult	Aquatic	Water	41.9	12.4	1.231214648	1.361727836	1.62324929	[3]
Amphibia	Anura	Bufonidae	Anaxyrus americanus charlesmithi	amph	41.68	41.68	-80.42	Non-adult	Aquatic	Water	40.7	NA	-1.096367484	2.617000341	NA	[3]
Actinopterygii	Anguilliformes	Anguillidae	Anguilla australis	fish	-37.97	37.97	175.65	Adult	Aquatic	Water	36	NA	0.441544745	0.985276743	NA	[1]
Actinopterygii	Perciformes	Haemulidae	Anisotremus scapularis	fish	-12.06	12.06	-77.15	Non-adult	Aquatic	Water	32.6	NA	0.42975228	1.193124598	NA	[7]
Reptilia	Squamata	Polychrotidae	Anolis carolinensis	rept	31	31	-89.8	Adult	Terrestrial	Air	41.7	4.7	0.255272505	1.068185862	1.403120521	[3]
Reptilia	Squamata	Polychrotidae	Anolis cupreus	rept	10.5	10.5	-84	Adult	Terrestrial	Air	38.4	11.8	0.255272505	0.924279286	1.260071388	[3]
Reptilia	Squamata	Polychrotidae	Anolis fuscoauratus	rept	-2.95	2.95	-59.91	Adult	Terrestrial	Air	39.8	8.4	0.143237916	1.725911632	1.859738566	[3]
Reptilia	Squamata	Polychrotidae	Anolis humilis	rept	10.5	10.5	-84	Adult	Terrestrial	Air	35.6	12.4	0.322219295	0.748188027	1.245512668	[2]
Reptilia	Squamata	Polychrotidae	Anolis intermedius	rept	10.16	10.16	-84.8	Adult	Terrestrial	Air	38.4	11.1	0.740362689	0.924279286	1.276461804	[2]
Reptilia	Squamata	Polychrotidae	Anolis lemurinus	rept	10.5	10.5	-84	Adult	Terrestrial	Air	37.3	12.9	0.255272505	0.86332286	1.23299611	[2]
Reptilia	Squamata	Polychrotidae	Anolis limifrons	rept	10.5	10.5	-84	Adult	Terrestrial	Air	36.8	12.3	0.698970004	0.832508913	1.247973266	[2]
Reptilia	Squamata	Polychrotidae	Anolis lionotus	rept	10.5	10.5	-84	Adult	Terrestrial	Air	36.7	14.7	0.544068044	0.826074803	1.184691431	[3]
Reptilia	Squamata	Polychrotidae	Anolis ortonii	rept	-2.95	2.95	-59.91	Adult	Terrestrial	Air	42.3	9.7	0.190331698	1.800717078	1.827369273	[3]
Reptilia	Squamata	Polychrotidae	Anolis planiceps	rept	-2.95	2.95	-59.91	Adult	Terrestrial	Air	40.3	9.6	1.311847527	1.741939078	1.829946696	[3]
Reptilia	Squamata	Polychrotidae	Anolis punctatus	rept	-0.91	0.91	-51.6	Adult	Terrestrial	Air	39.6	8	0.802773725	1.719331287	1.86923172	[3]
Reptilia	Squamata	Polychrotidae	Anolis tropidolepis	rept	10.16	10.16	-84.8	Adult	Terrestrial	Air	33.1	9.5	1.255272505	0.491361694	1.311753861	[3]
Insecta	Hymenoptera	Formicidae	Anonychomyrma gilberti	insect	-19.21	19.21	146.41	Adult	Terrestrial	Air	55.45454545	NA	-3.101873482	1.483652122	NA	[3]
Insecta	Hymenoptera	Vespoidea	Aphaenogaster fulva	insect	33.74	33.74	-92.33	Adult	Terrestrial	Air	42	NA	-2.477121298	1.579783597	NA	[3]
Insecta	Hymenoptera	Formicidae	Aphaenogaster senilis	insect	41.3	41.3	2.09	Adult	Terrestrial	Air	46	NA	-2.823908741	2.113943352	NA	[3]
Insecta	Hymenoptera	Vespoidea	Aphaenogaster texana	insect	33.74	33.74	-92.33	Adult	Terrestrial	Air	45	NA	-2.477121298	1.643452676	NA	[5]
Insecta	Hemiptera	Aphelocheiridae	Aphelocheirus aestivalis	insect	50.4	50.4	-4.28	Adult	Aquatic	Water	36.6	NA	-1.279320161	2.026941628	NA	[5]
Insecta	Hymenoptera	Braconidae	Aphidius avenae	insect	48.1	48.1	-1.8	Adult	Terrestrial	Air	44.2	-5.5	-3.527243551	1.283301229	1.40654018	[8]
Insecta	Hymenoptera	Braconidae	Aphidius rhopalosiphi	insect	48.1	48.1	-1.8	Adult	Terrestrial	Air	43.5	-5.5	-3.66756154	1.267171728	1.40654018	[2]
Insecta	Coleoptera	Aphodiidea	Aphodius lapponum	insect	54.2	54.2	-2.48	Adult	Terrestrial	Air	41.92	-0.8	-1.42571982	1.377306251	1.499687083	[2]
Actinopterygii	Perciformes	Cichlidae	Apistogramma borellii	fish	-3.08	3.08	-59.99	Adult	Aquatic	Water	41.3	NA	-0.518557371	1.498310554	NA	[2]
Actinopterygii	Perciformes	Cichlidae	Apistogramma gephyra	fish	-3.08	3.08	-59.99	Adult	Aquatic	Water	40.8	NA	0.198657087	1.462397998	NA	[2]
Actinopterygii	Perciformes	Cichlidae	Apistogramma hippolytae	fish	-2.88	2.88	-59.96	Adult	Aquatic	Water	38.62	NA	0.305351369	2.930057125	NA	[2]
Malacostraca	Isopoda	Armadillidiidae	Armadillidium vulgare	crust	-33.93	33.93	18.86	Adult	Terrestrial	Air	47	NA	-1.2069084	1.832508913	NA	[2]
Reptilia	Squamata	Gymnophthalmidae	Arthrosaura kockii	rept	-0.91	0.91	-51.6	Adult	Terrestrial	Air	43.4	10.1	0.569607968	1.829946696	1.816903839	[2]
Reptilia	Squamata	Gymnophthalmidae	Arthrosaura reticulata	rept	-2.95	2.95	-59.91	Adult	Terrestrial	Air	36.1	8.6	0.305197773	1.584331224	1.854913022	[2]
Malacostraca	Isopoda	Asellidae	Asellus aquaticus	crust	51.82	51.82	5.87	Adult	Aquatic	Water	35.59	NA	-1.537003388	2.010130277	NA	[2]
Reptilia	Squamata	Teiidae	Aspidoscelis tigris	rept	43	43	-116	Adult	Terrestrial	Air	45.1	10.5	2.530199698	1.178976947	1.290034611	[1]
Malacostraca	Decapoda	Astacidae	Astacus astacus	crust	10.03	10.03	105.76	Adult	Aquatic	Water	35.7	NA	1.914343157	2.770852012	NA	[2]
Actinopterygii	Perciformes	Cichlidae	Astronotus ocellatus	fish	-2.86	2.86	-59.14	Non-adult	Aquatic	Water	39.7	NA	0.47348697	1.767155866	NA	[1]
Insecta	Hymenoptera	Formicidae	Azteca chartifex	insect	9.15	9.15	-79.83	Adult	Terrestrial	Air	48	NA	-3.292429824	1.511883361	NA	[1]
Actinopterygii	Cypriniformes	Cyprinidae	Barilius bendelisis	fish	29.45	29.45	79.47	Non-adult	Aquatic	Water	36.02	2.77	0.881954971	1.666205875	1.418853478	[1]
Actinopterygii	Perciformes	Gobiidae	Bathygobius fuscus	fish	-5.46	5.46	123.78	Adult	Intertidal	Water	42.7	10.2	-0.698970004	1.50965048	1.355387658	[9]
Actinopterygii	Perciformes	Gobiidae	Bathygobius soporator	fish	24.63	24.63	-82.92	Non-adult	Intertidal	Water	40.92	NA	0.322219295	1.520197907	NA	[10]
Insecta	Hymenoptera	Apidae	Bombus bimaculatus	insect	35.8	35.8	-76.68	Adult	Terrestrial	Air	44.66	NA	-0.704935259	1.594613509	NA	[3]
Insecta	Hymenoptera	Apidae	Bombus griseocollis	insect	35.8	35.8	-76.68	Adult	Terrestrial	Air	45.31	NA	-0.479612733	1.608739919	NA	[3]
Insecta	Hymenoptera	Apidae	Bombus impatiens	insect	35.8	35.8	-76.68	Adult	Terrestrial	Air	46.07	NA	-0.779490286	1.624694531	NA	[3]
Insecta	Coleoptera	Curculionidae	Bothrometopus brevis	insect	-46.9	46.9	37.95	Adult	Terrestrial	Air	34.4	-5.1	-1.387216143	1.245512668	2.008600172	[11]
Insecta	Coleoptera	Curculionidae	Bothrometopus gracilipes	insect	-46.9	46.9	37.95	Adult	Terrestrial	Air	36.8	-6	-1.387216143	1.434568904	2.079181246	[12]
Actinopterygii	Siluriformes	Callichthyidae	Brochis splendens	fish	-3.08	3.08	-59.99	Adult	Aquatic	Water	38.9	NA	0.808616035	1.736396502	NA	[3]
Actinopterygii	Characiformes	Characidae	Brycon amazonicus	fish	-2.86	2.86	-59.14	Non-adult	Aquatic	Water	39.4	NA	0.16879202	1.342422681	NA	[3]
Amphibia	Anura	Eleutherodactylidae	Bryophryne cophites	amph	-12.56	12.56	-70.1	Adult	Aquatic	Air	28	1.6	0.079181246	0.954242509	1.240549248	[3]
Amphibia	Anura	Eleutherodactylidae	Bryophryne nubilosus	amph	-12.56	12.56	-70.1	Adult	Aquatic	Air	27.3	NA	-0.15490196	0.919078092	NA	[3]
Amphibia	Anura	Bufonidae	Bufo bufo	amph	37.49	37.49	-4.36	Non-adult	Aquatic	Water	38	3.2	-1.275069086	1.857332496	1.827369273	[3]
Malacostraca	Decapoda	Portunidae	Callinectes similis	crust	21.16	21.16	-90	Adult	Aquatic	Water	41.5	10.35	1.431363764	1.583576586	1.40654018	[3]
Insecta	Odonata	Calopterygidae	Calopteryx virgo	insect	50.4	50.4	-4.28	Non-adult	Aquatic	Water	39.14	NA	-0.937079736	2.066549539	NA	[13]
Insecta	Hymenoptera	Formicidae	Camponotus cruentatus	insect	41.3	41.3	2.09	Adult	Terrestrial	Air	48	NA	-2.920818754	2.146128036	NA	[14]
Insecta	Hymenoptera	Formicidae	Camponotus foreli	insect	41.3	41.3	2.09	Adult	Terrestrial	Air	48	NA	-2.920818754	2.146128036	NA	[15]
Insecta	Hymenoptera	Formicidae	Camponotus pennsylvanicus	insect	33.74	33.74	-92.33	Adult	Terrestrial	Air	44	NA	-1.574031262	1.62324929	NA	[15]
Insecta	Hymenoptera	Formicidae	Camponotus sylvaticus	insect	41.3	41.3	2.09	Adult	Terrestrial	Air	46	NA	-2.744727495	2.113943352	NA	[15]
Actinopterygii	Cypriniformes	Cyprinidae	Campostoma anomalum	fish	39.51	39.51	-84.7	Adult	Aquatic	Water	35.8	NA	0	1.10720997	NA	[15]
Malacostraca	Decapoda	Cancridae	Cancer pagurus	crust	54.69	54.69	-1.16	Adult	Aquatic	Water	31.5	NA	2.146438135	1.67669361	NA	[15]
Insecta	Coleoptera	Curculionidae	Canonopsis sericeus	insect	-46.9	46.9	37.95	Adult	Terrestrial	Air	38.7	-5	-1.387216143	1.541579244	2	[16]
Malacostraca	Decapoda	Carcinidae	Carcinus maenas	crust	54.69	54.69	-1.16	Adult	Aquatic	Water	35.8	NA	1.978636948	1.838849091	NA	[17]
Actinopterygii	Characiformes	Gasteropelecidae	Carnegiella strigata	fish	-3.08	3.08	-59.99	Adult	Aquatic	Water	39.6	NA	-0.2644011	1.633468456	NA	[18]
Insecta	Hymenoptera	Formicidae	Cataglyphis cursor	insect	41.3	41.3	2.09	Adult	Terrestrial	Air	50	NA	-2.958607315	2.176091259	NA	[19]
Actinopterygii	Cypriniformes	Cyprinidae	Catla catla	fish	19.59	19.59	72.83	Non-adult	Aquatic	Water	42.7	13.9	1.447158031	1.348953548	1.605664116	[20]
Actinopterygii	Cypriniformes	Catostomidae	Catostomus clarkii	fish	32.83	32.83	-110.71	Adult	Aquatic	Water	35.1	NA	1.740362689	1.703291378	NA	[20]
Actinopterygii	Cypriniformes	Catostomidae	Catostomus commersoni	fish	39.5	39.5	-91.5	Adult	Aquatic	Water	34.9	NA	0.799340549	2.718941085	NA	[21]
Actinopterygii	Cypriniformes	Catostomidae	Catostomus latipinnis	fish	38.86	38.86	-113.92	Adult	Aquatic	Water	37.17	NA	1.213517757	1.705079337	NA	[17]
Actinopterygii	Perciformes	Centropomidae	Centropomus undecimalis	fish	21.01	21.01	-89.8	Non-adult	Aquatic	Water	41.9	10.7	0.62324929	1.075546961	0.86332286	[22]
Insecta	Hymenoptera	Formicidae	Cephalotes atratus	insect	9.15	9.15	-79.83	Adult	Terrestrial	Air	50	NA	-2.555955204	1.574031268	NA	[17]
Insecta	Hymenoptera	Apidae	Ceratina calcarata	insect	35.8	35.8	-76.68	Adult	Terrestrial	Air	48.06	NA	-1.915509839	1.663889299	NA	[17]
Insecta	Hymenoptera	Apidae	Ceratina strenua	insect	35.8	35.8	-76.68	Adult	Terrestrial	Air	51.25	NA	-2.134367846	1.720159303	NA	[23]
Insecta	Diptera	Tephritidae	Ceratitis capitata	insect	-25.47	25.47	31	Adult	Terrestrial	Air	42	6.28	-2.22184875	1.832508913	1.874365836	[17]
Amphibia	Anura	Ceratophridae	Ceratophrys aurita	amph	-13.92	13.92	-41.11	Non-adult	Aquatic	Water	41	6.6	-0.063989204	1.924279286	1.72916479	[17]
Entognatha	Poduromorpha	Hypogastruridae	Ceratophysella denticulata	col	-54.5	54.5	158.9	Adult	Terrestrial	Air	38.28	-4.43	-4.399027104	2.563006187	2.275541688	[17]
Actinopterygii	Perciformes	Channichthyidae	Chaenocephalus aceratus	fish	-64.13	64.13	-62.66	Adult	Aquatic	Water	13.9	NA	2.84509804	2.36486355	NA	[17]
Actinopterygii	Characiformes	Crenuchidae	Characidium pteroides	fish	-2.88	2.88	-59.96	Adult	Aquatic	Water	35.16	NA	0.049218023	2.802773725	NA	[24]
Reptilia	Squamata	Sphaerodactylidae	Chatogekko amazonicus	rept	-2.95	2.95	-59.91	Adult	Terrestrial	Air	38.6	9.4	-0.544241797	1.684845362	1.835056102	[25]
Actinopterygii	Perciformes	Apogonidae	Cheilodipterus quinquelineatus	fish	-14.6	14.6	145.46	Adult	Aquatic	Water	38.4	NA	0.86923172	2.447158031	NA	[19]
Reptilia	Testudines	Chelydridae	Chelydra serpentina	rept	42.96	42.96	-78.95	Adult	Aquatic	Air	41.4	NA	1.125481266	1.214843848	NA	[26]
Actinopterygii	Perciformes	Channichthyidae	Chionodraco rastrospinosus	fish	-64.13	64.13	-62.66	Adult	Aquatic	Water	13.3	NA	2.84509804	2.345700391	NA	[27]
Actinopterygii	Cypriniformes	Cyprinidae	Chrosomus erythrogaster	fish	38	38	-92	Adult	Aquatic	Water	35.9	NA	0.161368002	2.765186273	NA	[28]
Actinopterygii	Perciformes	Pomacentridae	Cirrhinus mrigala	fish	19.59	19.59	72.83	Non-adult	Aquatic	Water	43.1	12.1	1.397940009	1.374137094	1.665893546	[29]
Actinopterygii	Perciformes	Cirrhitidae	Cirrhitichthys oxycephalus	fish	2.96	2.96	-78.18	Adult	Aquatic	Water	35.8	11.4	0.301029996	2.968482949	3.178976947	[30]
Actinopterygii	Characiformes	Characidae	Colossoma macropomum	fish	-2.86	2.86	-59.14	Non-adult	Aquatic	Water	44	NA	-0.237321436	1.653212514	NA	[31]
Reptilia	Squamata	Scincidae	Copeoglossum nigropunctatum	rept	-2.95	2.95	-59.91	Adult	Terrestrial	Air	39.5	11.3	1.088974945	1.716003344	1.783903579	[32]
Amphibia	Anura	Microhylidae	Cophixalus aenigma	amph	-17.5	17.5	145.5	Adult	Terrestrial	Air	28.09	NA	-0.22184875	0.907948522	NA	[33]
Amphibia	Anura	Microhylidae	Cophixalus bombiens	amph	-17.5	17.5	145.5	Adult	Terrestrial	Air	32.36	NA	-0.522878745	1.092018471	NA	[33]
Amphibia	Anura	Microhylidae	Cophixalus exiguus	amph	-17.5	17.5	145.5	Adult	Terrestrial	Air	35.93	NA	-0.397940009	1.202215776	NA	[21]
Amphibia	Anura	Microhylidae	Cophixalus hosmeri	amph	-17.5	17.5	145.5	Adult	Terrestrial	Air	31.73	NA	-0.522878745	1.069298012	NA	[21]
Amphibia	Anura	Microhylidae	Cophixalus infacetus	amph	-17.5	17.5	145.5	Adult	Terrestrial	Air	35.08	NA	-0.301029996	1.178401342	NA	[21]
Amphibia	Anura	Microhylidae	Cophixalus mcdonaldi	amph	-17.5	17.5	145.5	Adult	Terrestrial	Air	32.77	NA	0.041392685	1.106190897	NA	[21]
Amphibia	Anura	Microhylidae	Cophixalus neglectus	amph	-17.5	17.5	145.5	Adult	Terrestrial	Air	30.7	NA	0.255272505	1.029383778	NA	[21]
Insecta	Coleoptera	Scarabaeidae	Copris elphenor	insect	-20.46	20.46	24.51	Adult	Terrestrial	Air	46.07	5.34	-0.02657194	1.882410684	1.937718444	[34]
Insecta	Isoptera	Rhinotermitidae	Coptotermes formosanus	insect	32.6	32.6	-85.48	Adult	Terrestrial	Air	45.9	7.2	-2.397940009	1.320146286	0.892094603	[35]
Insecta	Odonata	Cordulegastridae	Cordulegaster boltonii	insect	50.4	50.4	-4.28	Non-adult	Aquatic	Water	39.08	NA	-0.265424174	2.065654394	NA	[18]
Actinopterygii	Siluriformes	Callichthyidae	Corydoras pulcher	fish	-3.08	3.08	-59.99	Adult	Aquatic	Water	37.4	NA	0.886885359	1.672097858	NA	[36]
Actinopterygii	Siluriformes	Callichthyidae	Corydoras schwartzi	fish	-3.08	3.08	-59.99	Adult	Aquatic	Water	41	NA	0.2219356	1.477121255	NA	[37]
Actinopterygii	Scorpaeniformes	Cottidae	Cottus bairdi	fish	34.19	34.19	-84.95	Adult	Aquatic	Water	33.83	NA	0.523746467	1.468839449	NA	[38]
Actinopterygii	Scorpaeniformes	Cottidae	Cottus carolinae	fish	34.77	34.77	-84.78	Adult	Aquatic	Water	34.34	NA	0.657055853	1.493225622	NA	[39]
Actinopterygii	Scorpaeniformes	Cottidae	Cottus paulus	fish	33.14	33.14	-85.63	Adult	Aquatic	Water	31.67	NA	-0.045757491	1.347004579	NA	[40]
Malacostraca	Decapoda	Crangonidae	Crangon crangon	crust	50.35	50.35	-4.18	Adult	Aquatic	Water	35.4	NA	-0.096910013	1.312459457	NA	[41]
Malacostraca	Amphipoda	Crangonyctidae	Crangonyx pseudogracilis	crust	51.92	51.92	5.52	Adult	Aquatic	Water	36.79	NA	-2.058488567	2.030032705	NA	[42]
Insecta	Hymenoptera	Formicidae	Crematogaster lineolata	insect	33.74	33.74	-92.33	Adult	Terrestrial	Air	47.5	NA	-2.273001299	1.69019608	NA	[43]
Insecta	Hymenoptera	Formicidae	Crematogaster obscurata	insect	33.74	33.74	-92.33	Adult	Terrestrial	Air	47.5	NA	-4.477555766	1.69019608	NA	[44]
Actinopterygii	Characiformes	Crenuchidae	Crenuchus spilurus	fish	-2.88	2.88	-59.96	Adult	Aquatic	Water	34.71	NA	-0.036212173	2.783099247	NA	[45]
Actinopterygii	Cypriniformes	Cyprinidae	Ctenopharyngodon idella	fish	35	35	-92.2	Adult	Aquatic	Water	39.3	NA	0.491361694	1.5132176	NA	[46]
Reptilia	Squamata	Scincidae	Ctenotus regius	rept	-34.18	34.18	139.98	Adult	Terrestrial	Air	45.1	8.7	0.653212514	1.004321374	1.419955748	[47]
Reptilia	Squamata	Scincidae	Ctenotus taeniolatus	rept	-30.51	30.51	151.67	Adult	Terrestrial	Air	44.7	11.4	1	0.986771734	1.372912003	[48]
Reptilia	Squamata	Scincidae	Ctenotus uber	rept	-34.55	34.55	139.61	Adult	Terrestrial	Air	45.5	9.1	0.991226076	1.021189299	1.413299764	[49]
Insecta	Diptera	Culicidae	Culex tarsalis	insect	37.61	37.61	-118.82	Adult	Terrestrial	Air	45.2	NA	-2.379863945	1.606381365	NA	[50]
Actinopterygii	Scorpaeniformes	Cyclopteridae	Cyclopterus lumpus	fish	45.57	45.57	-52.73	Adult	Aquatic	Water	22.3	NA	1.356025857	2.322219295	NA	[51]
Actinopterygii	Cypriniformes	Cyprinidae	Cyprinella lutrensis	fish	35.93	35.93	-100.04	Non-adult	Aquatic	Water	38.99	NA	-0.298931899	1.145817714	NA	[52]
Actinopterygii	Cypriniformes	Cyprinidae	Cyprinella spiloptera	fish	39.3	39.3	-84.6	Adult	Aquatic	Water	31.8	4.5	0.579783597	1.292256071	1.544068044	[53]
Actinopterygii	Cyprinodontiformes	Cyprinodontidae	Cyprinodon artifrons	fish	16.8	16.8	-88.1	Adult	Aquatic	Water	43.7	NA	-0.568636236	1.659599312	NA	[53]
Actinopterygii	Cyprinodontiformes	Cyprinodontidae	Cyprinodon macularius	fish	32.83	32.83	-110.71	Adult	Aquatic	Water	40	NA	0.176091259	1.875061263	NA	[44]
Actinopterygii	Cyprinodontiformes	Cyprinodontidae	Cyprinodon variegatus	fish	26.06	26.06	-97.15	Adult	Aquatic	Water	44.2	0.6	0.093421685	2.152288344	1.643452676	[53]
Actinopterygii	Cypriniformes	Cyprinidae	Danio albolineatus	fish	49.26	49.26	-123.17	Adult	Aquatic	Water	38.9	NA	-0.207608311	1.665893546	NA	[54]
Actinopterygii	Cypriniformes	Cyprinidae	Danio choprai	fish	49.26	49.26	-123.17	Adult	Aquatic	Water	37.2	NA	-0.515700161	1.609238576	NA	[55]
Actinopterygii	Cypriniformes	Cyprinidae	Danio rerio	fish	33.14	33.14	-97	Adult	Aquatic	Water	41.7	6.2	-0.301029996	1.591064607	1.662757832	[56]
Branchipoda	Cladocera	Daphniidae	Daphnia magna	crust	53.26	53.26	-3	Adult	Aquatic	Water	38.2	NA	-3.522878745	0.959041392	NA	[53]
Amphibia	Anura	Hylidae	Dendropsophus branneri	amph	-14.59	14.59	-39.06	Non-adult	Aquatic	Water	41.8	7.8	-0.838631998	1.940516485	1.688419822	[53]
Amphibia	Anura	Hylidae	Dendropsophus elegans	amph	-14.79	14.79	-39.17	Non-adult	Aquatic	Water	40.8	5.9	-1.101549081	1.920123326	1.751279104	[57]
Amphibia	Anura	Hylidae	Dendropsophus haddadi	amph	-14.79	14.79	-39.17	Non-adult	Aquatic	Water	39.6	5.8	-1.520924567	1.894316063	1.754348336	[53]
Amphibia	Anura	Hylidae	Dendropsophus novaisi	amph	-13.92	13.92	-41.11	Non-adult	Aquatic	Water	43.3	6.1	-0.711108306	1.969415912	1.745074792	[58]
Insecta	Coleoptera	Dytiscidae	Deronectes algibensis	insect	36.43	36.43	-5.45	Adult	Aquatic	Air	45.7	-3.8	-2.004803708	1.401400541	1.26245109	[48]
Insecta	Coleoptera	Dytiscidae	Deronectes angusi	insect	42.31	42.31	-3.72	Adult	Aquatic	Air	44.3	-9.4	-2.039053804	1.474216264	1.378397901	[47]
Insecta	Coleoptera	Dytiscidae	Deronectes aubei aubei	insect	44	44	7.43	Adult	Aquatic	Air	44.1	-8.3	-2.197910742	1.372912003	1.357934847	[59]
Insecta	Coleoptera	Dytiscidae	Deronectes bicostatus	insect	40.98	40.98	-3.81	Adult	Aquatic	Air	44.8	-9.4	-2.166215625	1.481442629	1.378397901	[19]
Insecta	Coleoptera	Dytiscidae	Deronectes brannanii	insect	39.78	39.78	2.74	Adult	Aquatic	Air	45.92	-8.16	-2.164943898	1.405175546	1.355259906	[60]
Insecta	Coleoptera	Dytiscidae	Deronectes depressicollis	insect	38.33	38.33	-1.65	Adult	Aquatic	Air	45.2	-7.7	-2.204119983	1.392696953	1.346352974	[44]
Insecta	Coleoptera	Dytiscidae	Deronectes fairmaiirei	insect	38.25	38.25	-1.73	Adult	Aquatic	Air	45.74	-7.4	-2.050122296	1.402089351	1.340444115	[61]
Insecta	Coleoptera	Dytiscidae	Deronectes hispanicus	insect	36.43	36.43	-5.42	Adult	Aquatic	Air	45.6	-5.7	-2.005243055	1.399673721	1.305351369	[60]
Insecta	Coleoptera	Dytiscidae	Deronectes lareynii	insect	41.78	41.78	9.08	Adult	Aquatic	Air	44.65	-10.75	-2.040005162	1.382917135	1.402261382	[47]
Insecta	Coleoptera	Dytiscidae	Deronectes latus	insect	50.75	50.75	-3.21	Adult	Aquatic	Air	46.9	-10	-2.099086932	1.421603927	1.389166084	[58]
Insecta	Coleoptera	Dytiscidae	Deronectes moestus	insect	42.39	42.39	9.19	Adult	Aquatic	Air	45.1	-9.3	-2.221125528	1.390935107	1.376576957	[62]
Insecta	Coleoptera	Dytiscidae	Deronectes opatrinus	insect	38.44	38.44	-4.23	Adult	Aquatic	Air	46.3	-8.5	-1.977159389	1.50242712	1.361727836	[53]
Insecta	Coleoptera	Dytiscidae	Deronectes platynotus mazzoldi	insect	42.04	42.04	23.15	Adult	Aquatic	Air	44.7	-6.1	-2.207608311	1.383815366	1.31386722	[53]
Insecta	Coleoptera	Dytiscidae	Deronectes semirufus	insect	43.93	43.93	7.18	Adult	Aquatic	Air	43.23	-9.6	-2.085656843	1.458335626	1.382017043	[53]
Insecta	Coleoptera	Dytiscidae	Deronectes wewalkai	insect	40.98	40.98	-3.81	Adult	Aquatic	Air	44	-9.3	-2.068542129	1.469822016	1.376576957	[63]
Amphibia	Caudata	Plethodontidae	Desmognathus ochrophorus	amph	36.9	36.9	-81	Adult	Terrestrial	Air	33.1	NA	0.004321374	1.346352974	NA	[63]
Actinopterygii	Perciformes	Moronidae	Dicentrarchus labrax	fish	36.76	36.76	35.79	Non-adult	Aquatic	Water	36	4.1	1.505149978	1.56427143	1.560305243	[63]
Malacostraca	Amphipoda	Gammaridae	Dikerogammarus villosus	crust	51.85	51.85	5.88	Adult	Aquatic	Water	32.32	NA	-1.198253381	1.950754182	NA	[44]
Insecta	Plecoptera	Perlidae	Dinocras cephalotes	insect	50.52	50.52	-3.82	Non-adult	Aquatic	Water	35.65	NA	-0.623423043	2.011147361	NA	[64]
Actinopterygii	Cypriniformes	Cyprinidae	Dionda diaboli	fish	29.12	29.12	-100.71	Non-adult	Aquatic	Water	37.8	NA	-1.643759937	1.556302501	NA	[65]
Actinopterygii	Perciformes	Sparidae	Diplodus bellottii	fish	38.68	38.68	-9.41	Adult	Aquatic	Water	27.3	NA	1.230448921	2.314393957	NA	[66]
Actinopterygii	Perciformes	Sparidae	Diplodus sargus	fish	38.68	38.68	-9.41	Adult	Aquatic	Water	33.8	NA	0.556302501	2.787106093	NA	[67]
Actinopterygii	Perciformes	Sparidae	Diplodus vulgaris	fish	38.68	38.68	-9.41	Adult	Aquatic	Water	31	NA	0.819543936	2.640978057	NA	[68]
Amphibia	Anura	Alytidae	Discoglossus scovazzi	amph	35.86	35.86	-5.38	Non-adult	Aquatic	Water	38.3	1.5	-1.139119464	1.864511081	1.86923172	[48]
Actinopterygii	Clupleiformes	Cupleidae	Dorosoma petenense	fish	37.74	37.74	-121.42	Adult	Aquatic	Water	33.3	NA	1.130333768	1.441956838	NA	[69]
Insecta	Hymenoptera	Formicidae	Dorymyrmex flavus	insect	33.74	33.74	-92.33	Adult	Terrestrial	Air	48.5	NA	-2.397940009	1.707570176	NA	[70]
Insecta	Diptera	Drosophilidae	Drosophila melanogaster	insect	55.63	55.63	12.36	Adult	Terrestrial	Air	40	3.7	-2.853871964	1.602059991	2.212187604	[70]
Insecta	Ephemeroptera	Heptageniidae	Ecdyonurus insignis	insect	50.4	50.4	-4.28	Non-adult	Aquatic	Water	35.38	NA	-1.253210168	2.006551609	NA	[71]
Malacostraca	Amphipoda	Gammaridae	Echinogammarus berilloni	crust	51.63	51.63	7.93	Adult	Aquatic	Water	33.98	NA	-1.723078868	1.98190917	NA	[72]
Malacostraca	Amphipoda	Gammaridae	Echinogammarus ischnus	crust	51.85	51.85	5.8	Adult	Aquatic	Water	31	NA	-1.301029996	2.176091259	NA	[73]
Insecta	Hymenoptera	Formicidae	Ectatomma ruidum	insect	9.15	9.15	-79.83	Adult	Terrestrial	Air	51	NA	-2.419075024	1.602059991	NA	[74]
Insecta	Coleoptera	Curculionidae	Ectemnorhinus viridis	insect	-46.9	46.9	37.95	Adult	Terrestrial	Air	33.9	-4.6	-1.387216143	1.193124598	1.963787827	[74]
Reptilia	Squamata	Scincidae	Egernia striolata	rept	-34.55	34.55	139.61	Adult	Terrestrial	Air	44.2	6.1	1.500373714	0.963787827	1.460897843	[74]
Actinopterygii	Perciformes	Gobiidae	Elacatinus lobeli	fish	16.76	16.76	-88.14	Non-adult	Aquatic	Water	39.1	13.8	-0.508638306	1.568201724	1.315270435	[75]
Actinopterygii	Perciformes	Gobiidae	Elacatinus oceanops	fish	25.16	25.16	-80.29	Non-adult	Aquatic	Water	35.5	14.7	0.049218023	1.397940009	1.247154615	[76]
Actinopterygii	Perciformes	Eleginopsidae	Eleginops maclovinus	fish	-54.86	54.86	-67.26	Non-adult	Aquatic	Water	30.69	-2.19	0.606918526	1.689900541	1.314569394	[76]
Actinopterygii	Mugiliformes	Mugilidae	Ellochelon vaigiensis	fish	-5.46	5.46	123.78	Adult	Aquatic	Water	44.5	9.9	0.113943352	1.583576586	1.374137094	[77]
Actinopterygii	Clupeiformes	Engraulidae	Engraulis japonicus	fish	35.18	35.18	140.35	Adult	Aquatic	Water	34.7	NA	0.698970004	1.90699671	NA	[55]
Insecta	Coleoptera	Hydrophilidae	Enochrus bicolor	insect	38.13	38.13	-1.13	Adult	Aquatic	Air	53.35	-12.51	-1.946537395	1.452553063	1.592287816	[41]
Insecta	Coleoptera	Hydrophilidae	Enochrus falcarius	insect	38.83	38.83	-1.45	Adult	Aquatic	Air	54.8	-13.46	-2.178486472	1.474216264	1.602710945	[78]
Insecta	Ephemeroptera	Ephemeridae	Ephemera danica	insect	50.91	50.91	-4.07	Non-adult	Aquatic	Water	38.63	NA	-1.233587153	2.058881339	NA	[79]
Amphibia	Anura	Bufonidae	Epidalea calamita	amph	37.79	37.79	-6.07	Non-adult	Aquatic	Water	40.3	0.6	-1.268255312	1.909556029	1.889861721	[78]
Reptilia	Squamata	Lacertidae	Eremias argus	rept	36.1	36.1	111.33	Adult	Terrestrial	Air	45	8	0.658011397	1.447158031	1.903089987	[79]
Reptilia	Squamata	Lacertidae	Eremias brenchleyi	rept	33.63	33.63	116.98	Adult	Terrestrial	Air	44.5	5	0.698970004	1.414973348	1.963787827	[80]
Reptilia	Squamata	Lacertidae	Eremias multiocellata	rept	41.45	41.45	106.98	Adult	Terrestrial	Air	43.5	9.2	1.096910013	1.342422681	1.876217841	[62]
Reptilia	Squamata	Scincidae	Eremiascincus fasciolatus	rept	-27.42	27.42	140.43	Adult	Terrestrial	Air	41.2	9	0.921166051	0.792391689	1.414973348	[68]
Reptilia	Squamata	Scincidae	Eremiascincus richardsonii	rept	-34.55	34.55	139.61	Adult	Terrestrial	Air	42	7.3	0.919078092	0.84509804	1.442479769	[81]
Actinopterygii	Perciformes	Percidae	Etheostoma caeruleum	fish	40.5	40.5	-83.87	Adult	Aquatic	Water	34.8	NA	-0.698970004	1.170261715	NA	[82]
Actinopterygii	Perciformes	Percidae	Etheostoma cragini	fish	39.12	39.12	-104.18	Adult	Aquatic	Water	38.5	NA	-0.301029996	1.230448921	NA	[47]
Actinopterygii	Perciformes	Percidae	Etheostoma flabellare	fish	40.5	40.5	-83.87	Adult	Aquatic	Water	34.9	NA	-0.22184875	1.173186268	NA	[47]
Actinopterygii	Perciformes	Percidae	Etheostoma nigrum	fish	40.39	40.39	-104.65	Adult	Aquatic	Water	37.3	NA	0.079181246	1.164352856	NA	[47]
Actinopterygii	Perciformes	Cichlidae	Etroplus suratensis	fish	11.48	11.48	79.78	Adult	Aquatic	Water	42.25	NA	0.653212514	1.153814864	NA	[51]
Actinopterygii	Perciformes	Gerreidae	Eucinostomus gracilis	fish	2.96	2.96	-78.18	Adult	Aquatic	Water	38	12.4	-1.698970004	3.06069784	3.149219113	[83]
Amphibia	Caudata	Plethodontidae	Eurycea nana	amph	29.88	29.88	-95.16	Adult	Terrestrial	Water	35.8	NA	-1.886056648	1.170261715	NA	[68]
Actinopterygii	Cyprinodontiformes	Cyprinodontidae	Floridichthys carpio	fish	16.8	16.8	-88.1	Adult	Aquatic	Water	42.2	NA	0.133538908	1.609238576	NA	[84]
Insecta	Hymenoptera	Formicidae	Formica incerta	insect	33.74	33.74	-92.33	Adult	Terrestrial	Air	48.7	NA	-2.246672308	1.710963119	NA	[48]
Actinopterygii	Perciformes	Tripterygiidae	Forsterygion lapillum	fish	-36.26	36.26	174.81	Adult	Intertidal	Water	31.5	NA	0.184691431	2.096910013	NA	[59]
Actinopterygii	Cyprinodontiformes	Fundulidae	Fundulus heteroclitus	fish	31.15	31.15	-81.3	Adult	Aquatic	Water	42.5	-1.1	0.920123326	1.452297671	1.054357662	[51]
Actinopterygii	Cyprinodontiformes	Fundulidae	Fundulus notatus	fish	39	39	-91	Adult	Aquatic	Water	38.3	NA	0.243038049	2.85945619	NA	[51]
Actinopterygii	Cyprinodontiformes	Fundulidae	Fundulus olivaceus	fish	38	38	-92	Adult	Aquatic	Water	38.8	NA	0.146128036	2.876761048	NA	[85]
Actinopterygii	Cyprinodontiformes	Fundulidae	Fundulus sciadicus	fish	38	38	-92	Adult	Aquatic	Water	37	NA	0.130333768	2.810943764	NA	[74]
Actinopterygii	Osmeriformes	Galaxiidae	Galaxias maculatus	fish	-37.97	37.97	175.65	Adult	Aquatic	Water	33.8	NA	0.476399456	0.895790748	NA	[74]
Actinopterygii	Cyprinodontiformes	Poeciliidae	Gambusia affinis	fish	32.99	32.99	-109.9	Adult	Aquatic	Water	43.2	NA	-0.568636236	1.436692598	NA	[56]
Actinopterygii	Cyprinodontiformes	Poeciliidae	Gambusia yucatana	fish	16.8	16.8	-88.1	Adult	Aquatic	Water	42.2	NA	-0.721246399	1.609238576	NA	[62]
Malacostraca	Amphipoda	Gammaridae	Gammarus fossarum	crust	51.82	51.82	5.94	Adult	Aquatic	Water	32.93	NA	-1.689519109	1.962464046	NA	[44]
Malacostraca	Amphipoda	Gammaridae	Gammarus pulex	crust	51.92	51.92	6.67	Adult	Aquatic	Water	34.85	NA	-1.26776712	1.997386384	NA	[53]
Malacostraca	Amphipoda	Gammaridae	Gammarus roeseli	crust	51.73	51.73	5.95	Adult	Aquatic	Water	33.63	NA	-1.217599048	1.975523713	NA	[86]
Malacostraca	Amphipoda	Gammaridae	Gammarus tigrinus	crust	52.42	52.42	4.69	Adult	Aquatic	Water	34.72	NA	-2.004364805	1.995108458	NA	[87]
Actinopterygii	Gasterosteiformes	Gasterosteidae	Gasterosteus aculeatus	fish	34.4	34.4	-118.75	Non-adult	Aquatic	Water	33.6	NA	0.113943352	1.77815125	NA	[66]
Actinopterygii	Cypriniformes	Cyprinidae	Gila elegans	fish	32.83	32.83	-110.71	Non-adult	Aquatic	Water	37.2	NA	2.230448921	1.785329835	NA	[47]
Actinopterygii	Cypriniformes	Cyprinidae	Gila robusta	fish	38.86	38.86	-113.92	Adult	Aquatic	Water	36.41	NA	1.796574333	1.677074403	NA	[53]
Insecta	Diptera	Glossinidae	Glossina pallidipes	insect	-0.64	0.64	34.31	Adult	Terrestrial	Air	44	7.8	-1.930331903	1.903089987	1.651278014	[44]
Actinopterygii	Perciformes	Eleotridae	Gobiomorphus basalis	fish	-37.97	37.97	175.65	Adult	Aquatic	Water	33.9	NA	0.505938957	0.966923541	NA	[88]
Actinopterygii	Perciformes	Eleotridae	Gobiomorphus cotidianus	fish	-37.97	37.97	175.65	Adult	Aquatic	Water	34	NA	0.504156189	0.970036777	NA	[64]
Actinopterygii	Perciformes	Nototheniidae	Gobionotothen gibberifrons	fish	-77.49	77.49	165	Adult	Aquatic	Water	17.9	NA	2.694605199	1.665893546	NA	[89]
Actinopterygii	Perciformes	Gobiidae	Gobius cobitis	fish	38.68	38.68	-9.41	Adult	Intertidal	Water	33.7	NA	0.06069784	2.782651752	NA	[44]
Actinopterygii	Perciformes	Gobiidae	Gobius niger	fish	38.68	38.68	-9.41	Adult	Intertidal	Water	34	NA	1.065206128	2.795880017	NA	[58]
Reptilia	Squamata	Sphaerodactylidae	Gonatodes humeralis	rept	-1.73	1.73	-51.45	Adult	Terrestrial	Air	40.9	8.7	0.10248185	1.760422483	1.852479994	[47]
Actinopterygii	Perciformes	Haemulidae	Haemulon flavolineatum	fish	24.63	24.63	-82.92	Non-adult	Aquatic	Water	36.17	NA	0.146128036	1.32115745	NA	[53]
Actinopterygii	Perciformes	Haemulidae	Haemulon steindachneri	fish	2.96	2.96	-78.18	Adult	Aquatic	Water	37.2	13.2	0.392696953	3.029383778	3.123851641	[41]
Insecta	Hymenoptera	Halictidae	Halictus ligatus	insect	35.8	35.8	-76.68	Adult	Terrestrial	Air	47.3	NA	-1.627841765	1.649334859	NA	[90]
Insecta	Coleoptera	Curculionidae	Halmaeusa atriceps	insect	-46.9	46.9	37.75	Adult	Terrestrial	Air	32.4	-4.1	-3	1.738780558	1.260071388	[60]
Reptilia	Squamata	Gekkonidae	Hemidactylus mabouia	rept	-2.95	2.95	-59.91	Adult	Terrestrial	Air	36.1	10.1	0.549463076	1.584331224	1.816903839	[48]
Actinopterygii	Characiformes	Characidae	Hemigrammus geisleri	fish	-2.88	2.88	-59.96	Adult	Aquatic	Water	32.37	NA	-0.455931956	2.663347505	NA	[47]
Malacostraca	Decapoda	Varunidae	Hemigrapsus crenulatus	crust	-41.62	41.62	-73.59	Adult	Intertidal	Water	34.9	3.2	0.960470778	1.037426498	1.245512668	[48]
Malacostraca	Decapoda	Varunidae	Hemigrapsus nudus	crust	48.9	48.9	-125.27	Adult	Intertidal	Water	33.6	3.5	0.698970004	1.546542663	1.113943352	[91]
Actinopterygii	Characiformes	Hemiodontidae	Hemiodus gracilis	fish	-3.08	3.08	-59.99	Adult	Aquatic	Water	37.4	NA	0.462847036	1.079181246	NA	[92]
Actinopterygii	Syngnathiformes	Syngnathidae	Hippocampus erectus	fish	21.28	21.28	-89.66	Non-adult	Aquatic	Water	33.4	10.2	-0.522878745	0.531478917	0.892094603	[74]
Reptilia	Squamata	Teiidae	Holcosus festivus	rept	10.5	10.5	-84	Adult	Terrestrial	Air	43.7	15.5	0.957128198	1.136720567	1.161368002	[56]
Actinopterygii	Siluriformes	Bagridae	Horabagrus brachysoma	fish	21.85	21.85	72.83	Adult	Aquatic	Water	42.8	13.2	1.361916619	1.355387658	0.77815125	[62]
Actinopterygii	Cypriniformes	Cyprinidae	Hybognathus placitus	fish	35.93	35.93	-100.04	Non-adult	Aquatic	Water	39.95	NA	0.021374608	1.174641193	NA	[67]
Actinopterygii	Cypriniformes	Cyprinidae	Hybopsis dorsalis	fish	39.5	39.5	-91.5	Adult	Aquatic	Water	36.6	NA	0.190331698	2.794856944	NA	[47]
Amphibia	Anura	Hylidae	Hyla arborea	amph	42.98	42.98	-5.92	Non-adult	Aquatic	Water	39.9	-0.8	-0.768974601	1.900913068	1.920123326	[47]
Amphibia	Anura	Hylidae	Hyla meridionalis	amph	37.99	37.99	-4.9	Non-adult	Aquatic	Water	39.4	0.3	-0.614639539	1.889861721	1.896526217	[85]
Amphibia	Anura	Hylidae	Hyla versicolor	amph	41.69	41.69	-80.49	Non-adult	Aquatic	Water	41.7	NA	-0.490797478	2.63748973	NA	[47]
Amphibia	Anura	Hyperoliidae	Hyperolius marmoratus	amph	-33.87	33.87	18.62	Adult	Aquatic	Air	46.4	1.2	0.130333768	1.728353782	1.440909082	[44]
Actinopterygii	Characiformes	Characidae	Hyphessobrycon erythrostigma	fish	-3.08	3.08	-59.99	Adult	Aquatic	Water	40	NA	-0.522878745	1.397940009	NA	[89]
Actinopterygii	Characiformes	Characidae	Hyphessobrycon melazonatus	fish	-2.88	2.88	-59.96	Adult	Aquatic	Water	32.6	NA	-0.193820026	2.67669361	NA	[62]
Entognatha	Poduromorpha	Hypogastruridae	Hypogastrura manubrialis	col	-37.91	37.91	144.98	Adult	Terrestrial	Air	36.82	-5.56	-3.934420285	2.526855987	2.324693914	[93]
Entognatha	Poduromorpha	Hypogastruridae	Hypogastrura purpurescens	col	-37.91	37.91	144.98	Adult	Terrestrial	Air	40	-4.54	-3.857923539	2.602059991	2.28057837	[44]
Entognatha	Poduromorpha	Hypogastruridae	Hypogastrura viatica	col	-54.5	54.5	158.9	Adult	Terrestrial	Air	38.84	-5.33	-4.103473783	2.576110894	2.315130317	[53]
Actinopterygii	Osmeriformes	Osmeridae	Hypomesus transpacificus	fish	38.53	38.53	-121.75	Non-adult	Aquatic	Water	29	NA	-0.096910013	1.500602351	NA	[44]
Actinopterygii	Cypriniformes	Cyprinidae	Hypophthalmichthys nobilis	fish	35	35	-92.2	Adult	Aquatic	Water	38.8	NA	0.414973348	1.499687083	NA	[94]
Amphibia	Anura	Hylidae	Hypsiboas albomarginatus	amph	-13.89	13.89	-39.22	Non-adult	Aquatic	Water	41.4	6.9	-0.16513442	1.932473765	1.719331287	[47]
Amphibia	Anura	Hylidae	Hypsiboas faber	amph	-15.42	15.42	-39.54	Non-adult	Aquatic	Water	41.6	5.5	-0.344899164	1.936513742	1.763427994	[95]
Actinopterygii	Siluriformes	Ictaluridae	Ictalurus punctatus	fish	34.77	34.77	-96.67	Non-adult	Aquatic	Water	40.3	2.7	1.176091259	1.53571597	1.612783857	[85]
Actinopterygii	Characiformes	Characidae	Iguanodectes geisleri	fish	-2.88	2.88	-59.96	Adult	Aquatic	Water	30.87	NA	0.190331698	2.564518119	NA	[66]
Insecta	Hemiptera	Naucoridae	Ilyocorus cimicoides	insect	50.4	50.4	-4.28	Adult	Aquatic	Water	41.55	NA	-0.969470673	2.101059355	NA	[66]
Reptilia	Squamata	Gymnophthalmidae	Iphisa elegans elegans	rept	-1.73	1.73	-51.45	Adult	Terrestrial	Air	38.4	3.1	0.491361694	1.677606953	1.971275849	[47]
Insecta	Plecoptera	Perlodidae	Isoperla namata	insect	36.22	36.22	-94.67	Non-adult	Aquatic	Water	33.18	NA	-1.278631478	1.703544242	NA	[47]
Reptilia	Squamata	Teiidae	Kentropyx calcarata	rept	-2.95	2.95	-59.91	Adult	Terrestrial	Air	41.7	11.9	1.095924495	1.783903579	1.766412847	[47]
Actinopterygii	Cypriniformes	Cyprinidae	Labeo rohita	fish	19.59	19.59	72.83	Non-adult	Aquatic	Water	42.9	13.7	1.477121255	1.361727836	1.612783857	[47]
Actinopterygii	Atheriniformes	Atherinopsidae	Labidesthes sicculus	fish	39	39	-93	Adult	Aquatic	Water	36	NA	0.176091259	2.769551079	NA	[19]
Reptilia	Squamata	Lacertidae	Lacerta agilis	rept	51.38	51.38	4.44	Adult	Terrestrial	Air	43.9	5.9	0.957128198	1.056904851	1.424881637	[77]
Insecta	Odonata	Libellulidae	Ladona deplanata	insect	33.19	33.19	-81.75	Non-adult	Aquatic	Water	41.25	NA	-2.321173536	0.665111737	NA	[96]
Actinopterygii	Perciformes	Cichlidae	Laetacara fulvipinnis	fish	-3.08	3.08	-59.99	Adult	Aquatic	Water	40.9	NA	0.017867719	1.809559715	NA	[41]
Insecta	Hymenoptera	Halictidae	Lasioglossum bruneri	insect	35.8	35.8	-76.68	Adult	Terrestrial	Air	44.65	NA	-1.867125751	1.59439255	NA	[97]
Insecta	Hymenoptera	Halictidae	Lasioglossum imitatum	insect	35.8	35.8	-76.68	Adult	Terrestrial	Air	45.88	NA	-2.409656698	1.62076049	NA	[89]
Actinopterygii	Clupeiformes	Lateolabracidae	Lateolabrax japonicus	fish	35.18	35.18	140.35	Adult	Aquatic	Water	39.1	NA	1.176091259	2.085243281	NA	[55]
Insecta	Plecoptera	Nemouridae	Lednia tumana	insect	48.7	48.7	-113.68	Non-adult	Aquatic	Water	21.85	NA	-3	1.358569317	NA	[85]
Actinopterygii	Cypriniformes	Cyprinidae	Lepidomeda copei	fish	40.96	40.96	-110.73	Non-adult	Aquatic	Water	35	NA	-1.161150909	1.544068044	NA	[85]
Actinopterygii	Perciformes	Nototheniidae	Lepidonotothen squamifrons	fish	-64.13	64.13	-62.66	Adult	Aquatic	Water	14.2	NA	2.84509804	2.374137094	NA	[41]
Reptilia	Squamata	Xantusiidae	Lepidophyma flavimaculatum	rept	10.5	10.5	-84	Adult	Terrestrial	Air	38	11.3	0.762678564	0.903089987	1.271841607	[98]
Actinopterygii	Perciformes	Centrarchidae	Lepomis cyanellus	fish	32.83	32.83	-110.71	Adult	Aquatic	Water	37.4	NA	1.819543936	1.792391689	NA	[99]
Actinopterygii	Perciformes	Centrarchidae	Lepomis humilis	fish	39.5	39.5	-91.5	Adult	Aquatic	Water	36.4	NA	0.574031268	2.786584418	NA	[99]
Actinopterygii	Perciformes	Centrarchidae	Lepomis macrochirus	fish	32.83	32.83	-110.71	Adult	Aquatic	Water	35.8	NA	2.720159303	1.73239376	NA	[100]
Actinopterygii	Perciformes	Centrarchidae	Lepomis megalotis	fish	30.62	30.62	-95.53	Non-adult	Aquatic	Water	41.2	NA	1.419955748	1.049218023	NA	[41]
Reptilia	Squamata	Gymnophthalmidae	Leposoma guianense	rept	-0.91	0.91	-51.6	Adult	Terrestrial	Air	37.3	10.4	1.112366188	1.635483747	1.808885867	[74]
Reptilia	Squamata	Gymnophthalmidae	Leposoma osvaldoi	rept	-2.95	2.95	-59.91	Adult	Terrestrial	Air	36.4	9.9	-0.213781128	1.597695186	1.822168079	[101]
Reptilia	Squamata	Gymnophthalmidae	Leposoma percarinatum	rept	-1.73	1.73	-51.45	Adult	Terrestrial	Air	38.7	9	-0.15539858	1.688419822	1.84509804	[102]
Amphibia	Anura	Leptodactylidae	Leptodactylus fuscus	amph	-14.66	14.66	-39.07	Non-adult	Aquatic	Water	43.6	8.2	-0.737746721	1.974971994	1.673941999	[67]
Insecta	Hymenoptera	Formicidae	Leptogenys mjobergi	insect	-19.21	19.21	146.41	Adult	Terrestrial	Air	42	NA	-2.744727495	1.230448921	NA	[48]
Insecta	Hymenoptera	Formicidae	Leptomyrmex rufipes	insect	-19.21	19.21	146.41	Adult	Terrestrial	Air	42.66666667	NA	-2.298144336	1.247154615	NA	[59]
Malacostraca	Decapoda	Pisidae	Libinia dubia	crust	21.16	21.16	-90	Adult	Aquatic	Water	41.5	9.4	1.924279286	1.583576586	1.457377197	[103]
Insecta	Coleoptera	Elmidae	Limnius volckmari	insect	50.4	50.4	-4.28	Adult	Aquatic	Water	36.375	NA	-2.635918259	2.02325246	NA	[104]
Insecta	Hymenoptera	Formicidae	Linepithema humile	insect	-33.91	33.91	18.85	Adult	Terrestrial	Air	40	0	-3.301029996	2.477121255	2.602059991	[105]
Actinopterygii	Perciformes	Blenniidae	Lipophrys pholis	fish	54.08	54.08	-4.75	Non-adult	Intertidal	Water	35.2	-1.3	1.190331698	2.403692338	2.274927193	[106]
Malacostraca	Decapoda	Lithodidae	Lithodes santolla	crust	-41.49	41.49	-72.89	Non-adult	Aquatic	Water	27.6	1.5	-0.994819487	1.193124598	1.021189299	[107]
Malacostraca	Decapoda	Penaeidae	Litopenaeus vannamei	crust	36.77	36.77	35.79	Non-adult	Aquatic	Water	42.2	7.5	1.026941628	2.882239848	2.670941281	[41]
Actinopterygii	Mugiliformes	Mugilidae	Liza ramado	fish	38.68	38.68	-9.41	Adult	Aquatic	Water	37.9	NA	-0.075720714	2.938894818	NA	[108]
Actinopterygii	Perciformes	Lutjanidae	Lutjanus apodus	fish	24.63	24.63	-82.92	Non-adult	Aquatic	Water	40.9	NA	0.041392685	1.519525103	NA	[109]
Actinopterygii	Perciformes	Lutjanidae	Lutjanus guttatus	fish	2.96	2.96	-78.18	Adult	Aquatic	Water	37.4	12	0.72427587	3.037426498	3.161368002	[110]
Actinopterygii	Cypriniformes	Cyprinidae	Luxilus chrysocephalus	fish	39.3	39.3	-84.6	Adult	Aquatic	Water	30.8	4.5	0.57634135	1.245512668	1.544068044	[44]
Actinopterygii	Cypriniformes	Cyprinidae	Luxilus cornutus	fish	39	39	-93	Adult	Aquatic	Water	35.7	NA	0.763427994	2.756322813	NA	[51]
Actinopterygii	Cypriniformes	Cyprinidae	Luxilus zonatus	fish	38	38	-92	Adult	Aquatic	Water	35.3	NA	0.462397998	2.738034027	NA	[111]
Actinopterygii	Perciformes	Zoarcidae	Lycodichthys dearborni	fish	-77.49	77.49	165	Adult	Aquatic	Water	15.4	NA	1.439332694	1.579783597	NA	[112]
Actinopterygii	Cypriniformes	Cyprinidae	Lythrurus umbratilis	fish	39	39	-93	Adult	Aquatic	Water	36.2	NA	0.113943352	2.77815125	NA	[96]
Malacostraca	Decapoda	Palaemonidae	Macrobrachium acanthurus	crust	18.36	18.36	-92.87	Adult	Aquatic	Water	39.8	11	0.77815125	0.892094603	0.954242509	[96]
Malacostraca	Decapoda	Palaemonidae	Macrobrachium malcolmsonii	crust	11.48	11.48	79.77	Non-adult	Aquatic	Water	41.4	NA	-0.045757491	1.579783597	NA	[113]
Malacostraca	Decapoda	Palaemonidae	Macrobrachium rosenbergii	crust	18	18	-102	Non-adult	Aquatic	Water	42	10.5	0.06069784	1	0.977723605	[80]
Malacostraca	Decapoda	Palaemonidae	Macrobrachium tenellum	crust	26.9	26.9	-112	Adult	Aquatic	Water	43	NA	0.761175813	1.041392685	NA	[65]
Insecta	Odonata	Macromiidae	Macromia illinoiensis	insect	33.19	33.19	-81.75	Non-adult	Aquatic	Water	38.81	NA	-2.167491087	0.532117116	NA	[41]
Reptilia	Testudines	Geoemydidae	Mauremys reevesii	rept	30.31	30.31	120.41	Non-adult	Aquatic	Air	42.23	1.38	0.790285164	2.121559844	2.441223674	[114]
Insecta	Hymenoptera	Megachilidae	Megachile campanulae	insect	35.8	35.8	-76.68	Adult	Terrestrial	Air	45.3	NA	-1.31777525	1.608526034	NA	[47]
Insecta	Hymenoptera	Megachilidae	Megachile exilis	insect	35.8	35.8	-76.68	Adult	Terrestrial	Air	46.37	NA	-1.303696289	1.630834518	NA	[80]
Insecta	Hymenoptera	Megachilidae	Megachile mendica	insect	35.8	35.8	-76.68	Adult	Terrestrial	Air	47.72	NA	-1.047757978	1.657438323	NA	[41]
Insecta	Hymenoptera	Megachilidae	Megachile rotundata	insect	35.8	35.8	-76.68	Adult	Terrestrial	Air	48.23	NA	-1.37103971	1.667079205	NA	[115]
Insecta	Hymenoptera	Formicidae	Messor bouvieri	insect	41.3	41.3	2.09	Adult	Terrestrial	Air	44	NA	-3	2.079181246	NA	[116]
Insecta	Hymenoptera	Formicidae	Messor capitatus	insect	41.3	41.3	2.09	Adult	Terrestrial	Air	44	NA	-2.769551079	2.079181246	NA	[80]
Actinopterygii	Characiformes	Crenuchidae	Microcharacidium eleotrioides	fish	-2.88	2.88	-59.96	Adult	Aquatic	Water	35.21	NA	0.049218023	2.804905759	NA	[62]
Actinopterygii	Perciformes	Centrarchidae	Micropterus salmoides	fish	34.77	34.77	-96.67	Non-adult	Aquatic	Water	38.5	3.2	1.176091259	1.977723605	1.594760753	[117]
Insecta	Hymenoptera	Formicidae	Monomorium minimum	insect	33.74	33.74	-92.33	Adult	Terrestrial	Air	50	NA	-3.778150382	1.73239376	NA	[118]
Arachnida	Araneae	Trochanteriidae	Morebilus plagusius	arac	-33.62	33.62	151.25	Adult	Terrestrial	Air	49.6	NA	-0.22184875	2.089905111	NA	[41]
Actinopterygii	Mugiliformes	Mugilidae	Mugil curema	fish	2.96	2.96	-78.18	Adult	Aquatic	Water	40.8	10.8	0.06069784	3.155336037	3.195899652	[85]
Actinopterygii	Cypriniformes	Cyprinidae	Mylopharodon conocephalus	fish	39.41	39.41	-121.62	Adult	Aquatic	Water	36.7	0.3	2.87667961	1.549671922	1.510869838	[85]
Insecta	Hymenoptera	Formicidae	Myrmecia nigrocincta	insect	-19.21	19.21	146.41	Adult	Terrestrial	Air	47.15384615	NA	-2.026516909	1.345449135	NA	[85]
Actinopterygii	Characiformes	Lebiasinidae	Nannostomus beckfordi	fish	-2.88	2.88	-59.96	Adult	Aquatic	Water	35.5	NA	-0.259637311	2.817069316	NA	[119]
Actinopterygii	Characiformes	Lebiasinidae	Nannostomus eques	fish	-3.08	3.08	-59.99	Adult	Aquatic	Water	41.7	NA	-0.485452247	1.525044807	NA	[120]
Actinopterygii	Characiformes	Lebiasinidae	Nannostomus marginatus	fish	-2.88	2.88	-59.96	Adult	Aquatic	Water	35.67	NA	-0.30980392	2.824044437	NA	[121]
Insecta	Coleoptera	Carabidae	Nebria acuta	insect	46.85	46.85	-121.76	Adult	Terrestrial	Air	33.734	-3.68725	-1.494850022	1.836767047	1.584741009	[122]
Insecta	Coleoptera	Carabidae	Nebria campbelli	insect	46.85	46.85	-121.76	Adult	Terrestrial	Air	34.105	-3.061666667	-1.596307668	1.848343095	1.547877218	[123]
Insecta	Coleoptera	Carabidae	Nebria crassicornis intermedia	insect	46.85	46.85	-121.76	Adult	Terrestrial	Air	34.119	-4.11675	-1.232844134	1.848773943	1.608352174	[123]
Insecta	Coleoptera	Carabidae	Nebria eschscholtzii	insect	46.85	46.85	-121.76	Adult	Terrestrial	Air	37.012	-3.801	-1.346787486	1.929725378	1.591120282	[124]
Insecta	Coleoptera	Carabidae	Nebria gebleri albimontis	insect	46.85	46.85	-121.76	Adult	Terrestrial	Air	33.145	-3.9986	-1.431329022	1.817730595	1.601983983	[124]
Insecta	Coleoptera	Carabidae	Nebria kincaidi	insect	46.85	46.85	-121.76	Adult	Terrestrial	Air	33.177	-3.8475	-1.195179321	1.81878655	1.593701329	[124]
Insecta	Coleoptera	Carabidae	Nebria mannerheimi	insect	46.85	46.85	-121.76	Adult	Terrestrial	Air	35.896	-3.397	-1.326979093	1.900257858	1.568025623	[125]
Insecta	Coleoptera	Carabidae	Nebria meanyi	insect	46.85	46.85	-121.76	Adult	Terrestrial	Air	35.253	-3.777	-1.295849483	1.882325275	1.589782103	[126]
Insecta	Coleoptera	Carabidae	Nebria metallica	insect	46.85	46.85	-121.76	Adult	Terrestrial	Air	34.006	-3.7775	-1.22184875	1.845284126	1.589810024	[122]
Insecta	Coleoptera	Carabidae	Nebria paradisi	insect	46.85	46.85	-121.76	Adult	Terrestrial	Air	33.92095238	-3.607877419	-1.214211081	1.842638952	1.580233511	[127]
Insecta	Coleoptera	Carabidae	Nebria piperi	insect	46.85	46.85	-121.76	Adult	Terrestrial	Air	34.704	-3.3995	-1.082231998	1.866405498	1.568172379	[128]
Insecta	Coleoptera	Carabidae	Nebria sahlbergi	insect	46.85	46.85	-121.76	Adult	Terrestrial	Air	34.311	-2.777	-1.557520231	1.854639986	1.53000749	[129]
Insecta	Coleoptera	Carabidae	Nebria vandykei vandykei	insect	46.85	46.85	-121.76	Adult	Terrestrial	Air	34.2435	-3.71	-0.948461609	1.852586724	1.586024382	[128]
Insecta	Coleoptera	Dytiscidae	Nebrioporus baeticus	insect	37.63	37.63	-1.36	Adult	Aquatic	Air	48	-10.1	-2.107905397	1.374748346	1.387389826	[130]
Insecta	Coleoptera	Dytiscidae	Nebrioporus cereysi	insect	37.6	37.6	-0.73	Adult	Aquatic	Air	47.3	-10.1	-2.454041189	1.361727836	1.387389826	[131]
Actinopterygii	Perciformes	Gobiidae	Neogobius melanostomus	fish	37.9	37.9	-122.04	Adult	Intertidal	Water	33.4	NA	0.838849091	1.264817823	NA	[131]
Insecta	Odonata	Corduliidae	Neurocordulia alabamensis	insect	33.19	33.19	-81.75	Non-adult	Aquatic	Water	38.15	NA	-2.131943638	0.48784512	NA	[122]
Reptilia	Squamata	Scincidae	Niveoscincus greeni	rept	-41.53	41.53	147.66	Adult	Terrestrial	Air	40.5	0.58	0.602059991	1.54321732	1.352785286	[132]
Reptilia	Squamata	Scincidae	Niveoscincus microlepidotus	rept	-42.89	42.89	147.23	Adult	Terrestrial	Air	40.4	0.46	0.687528961	1.541510856	1.356384433	[125]
Reptilia	Squamata	Scincidae	Niveoscincus ocellatus	rept	-42.58	42.58	147.85	Adult	Terrestrial	Air	41.7	5.56	2.354108439	1.563188401	1.145157545	[125]
Amphibia	Anura	Eleutherodactylidae	Noblella myrmecoides	amph	-12.56	12.56	-70.1	Adult	Aquatic	Air	30.9	11.7	-1	1.075546961	0.86332286	[125]
Actinopterygii	Cypriniformes	Cyprinidae	Nocomis biguttatus	fish	38	38	-92	Adult	Aquatic	Water	35.6	NA	0.851258349	2.751822312	NA	[133]
Reptilia	Squamata	Dactyloidae	Norops chrysolepis	rept	-2.95	2.95	-59.91	Adult	Terrestrial	Air	39.7	9.4	0.788168371	1.722633923	1.835056102	[133]
Actinopterygii	Perciformes	Labridae	Notolabrus celidotus	fish	-43.6	43.6	172.84	Adult	Aquatic	Water	32.4	3.5	1.130333768	2.447158031	2.176091259	[123]
Insecta	Hymenoptera	Formicidae	Notostigma carazzii	insect	-19.21	19.21	146.41	Adult	Terrestrial	Air	40.5	NA	-1.852323676	1.190331698	NA	[129]
Actinopterygii	Perciformes	Nototheniidae	Notothenia coriiceps	fish	-77.49	77.49	165	Adult	Aquatic	Water	17.4	NA	2.537819095	1.649983544	NA	[129]
Actinopterygii	Cypriniformes	Cyprinidae	Notropis atherinoides	fish	35.93	35.93	-100.04	Non-adult	Aquatic	Water	37.65	NA	-0.434743486	1.102090526	NA	[128]
Actinopterygii	Cypriniformes	Cyprinidae	Notropis girardi	fish	35.93	35.93	-100.04	Non-adult	Aquatic	Water	38.64	NA	-0.298931899	1.13481437	NA	[129]
Actinopterygii	Cypriniformes	Cyprinidae	Notropis nubilus	fish	38	38	-92	Adult	Aquatic	Water	36.2	NA	0.243038049	2.77815125	NA	[133]
Actinopterygii	Cypriniformes	Cyprinidae	Notropis rubellus	fish	39	39	-93	Adult	Aquatic	Water	35.3	NA	0.243038049	2.738034027	NA	[129]
Actinopterygii	Cypriniformes	Cyprinidae	Notropis stramineus	fish	39	39	-92.5	Adult	Aquatic	Water	37	NA	0.079181246	2.810943764	NA	[132]
Actinopterygii	Cypriniformes	Cyprinidae	Noturus exilis	fish	39	39	-93	Adult	Aquatic	Water	36.5	NA	0.681241237	2.790740378	NA	[125]
Actinopterygii	Perciformes	Lutjanidae	Ocyurus chrysurus	fish	21.01	21.01	-89.8	Non-adult	Aquatic	Water	38.7	11.8	0.989449818	0.939519253	0.792391689	[125]
Actinopterygii	Atheriniformes	Atherinopsidae	Odontesthes nigricans	fish	-54.86	54.86	-67.26	Non-adult	Aquatic	Water	32.3	-2.2	0.62838893	1.73506635	1.315270435	[134]
Insecta	Hymenoptera	Formicidae	Odontomachus cephalotes	insect	-19.21	19.21	146.41	Adult	Terrestrial	Air	42.83333333	NA	-2.477121298	1.251232527	NA	[135]
Actinopterygii	Salmoniformes	Salmonidae	Oncorhynchus gilae	fish	33.3	33.3	-107.96	Non-adult	Aquatic	Water	29.6	NA	1.713490543	2.681241237	NA	[136]
Actinopterygii	Salmoniformes	Salmonidae	Oncorhynchus keta	fish	35.18	35.18	140.35	Non-adult	Aquatic	Water	29.6	NA	1.301029996	2.063193141	NA	[123]
Actinopterygii	Salmoniformes	Salmonidae	Oncorhynchus kisutch	fish	46.28	46.28	-119.28	Non-adult	Aquatic	Water	36.56	NA	1.602059991	1.219060332	NA	[128]
Actinopterygii	Salmoniformes	Salmonidae	Oncorhynchus mykiss gairdneri	fish	40.93	40.93	-121.54	Non-adult	Aquatic	Water	29.8	0.1	1.176091259	1.819543936	1.51851394	[128]
Malacostraca	Amphipoda	Talitridae	Orchestia gammarellus	crust	64.01	64.01	-22.33	Adult	Intertidal	Air	38.6	NA	-1.397940009	1.220108088	NA	[137]
Malacostraca	Decapoda	Cambaridae	Orconectes rusticus	crust	39.44	39.44	-84.52	Adult	Aquatic	Water	41.3	NA	0.944482672	1.021189299	NA	[138]
Malacostraca	Decapoda	Cambaridae	Orconectes virilis	crust	39.44	39.44	-84.52	Adult	Aquatic	Water	39.2	NA	1.555698895	0.84509804	NA	[138]
Amphibia	Anura	Eleutherodactylidae	Oreobates cruralis	amph	-12.56	12.56	-70.1	Adult	Aquatic	Air	34.8	15.2	0.079181246	1.198657087	0.579783597	[138]
Amphibia	Anura	Eleutherodactylidae	Oreobates gemcare	amph	-12.56	12.56	-70.1	Adult	Aquatic	Air	26.5	NA	0.531478917	0.875061263	NA	[138]
Amphibia	Anura	Eleutherodactylidae	Oreobates granulosus	amph	-12.56	12.56	-70.1	Adult	Aquatic	Air	30.4	NA	0.477121255	1.056904851	NA	[139]
Actinopterygii	Perciformes	Apogonidae	Ostorhinchus novemfasciatus	fish	-5.46	5.46	123.78	Adult	Aquatic	Water	40.1	12.9	-0.397940009	1.374137094	1.135662602	[138]
Actinopterygii	Perciformes	Zoarcidae	Pachycara brachycephalum	fish	-77.49	77.49	165	Adult	Aquatic	Water	17.2	NA	1.793790385	1.643452676	NA	[138]
Actinopterygii	Perciformes	Nototheniidae	Pagothenia borchgrevinki	fish	-77.49	77.49	165	Adult	Aquatic	Water	15.2	NA	2.006466042	1.572096768	NA	[138]
Actinopterygii	Clupeiformes	Sparidae	Pagrus major	fish	35.18	35.18	140.35	Adult	Aquatic	Water	35.7	NA	2.008600172	1.967412633	NA	[139]
Malacostraca	Decapoda	Palaemonidae	Palaemon elegans	crust	12.44	12.44	-7.58	Adult	Aquatic	Water	35	NA	-0.301029996	1.124938737	NA	[138]
Malacostraca	Decapoda	Palaemonidae	Palaemon macrodactylus	crust	51.48	51.48	-0.6	Adult	Aquatic	Water	37.8	NA	-0.15490196	1.232148706	NA	[138]
Malacostraca	Decapoda	Palaemonidae	Palaemon serratus	crust	50.35	50.35	-4.11	Adult	Aquatic	Water	33.5	NA	0.079181246	1.054357662	NA	[138]
Malacostraca	Decapoda	Palaemonidae	Palaemon varians	crust	50.73	50.73	-1.53	Adult	Aquatic	Water	36	NA	-0.522878745	1.166331422	NA	[138]
Malacostraca	Decapoda	Palaemonidae	Pandalus montagui	crust	50.35	50.35	-0.83	Adult	Aquatic	Water	27.6	NA	0.041392685	1.005752329	NA	[138]
Actinopterygii	Siluriformes	Pangasiidae	Pangasius pangasius	fish	22.57	22.57	88.39	Adult	Aquatic	Water	44.1	12.4	1.356025857	1.30820858	1.768391413	[138]
Malacostraca	Amphipoda	Maeridae	Paraceradocus gibber	crust	-67.57	67.57	-68.13	Adult	Aquatic	Water	14.69	NA	-0.031517051	3.067814511	NA	[140]
Malacostraca	Amphipoda	Maeridae	Paraceradocus miersi	crust	-67.56	67.56	-40.12	Adult	Aquatic	Water	15.1	NA	-0.065501549	3.178976947	NA	[128]
Actinopterygii	Characiformes	Characidae	Paracheirodon axelrodi	fish	-3.14	3.14	-59.93	Non-adult	Aquatic	Water	41	12	-0.698970004	1.750122527	1.837272703	[141]
Actinopterygii	Characiformes	Characidae	Paracheirodon simulans	fish	-3.14	3.14	-59.93	Non-adult	Aquatic	Water	42	12	-1.22184875	1.795880017	1.837272703	[123]
Actinopterygii	Pleuronectiformes	Paralichthyidae	Paralichthys olivaceus	fish	37.57	37.57	126.99	Adult	Aquatic	Water	28.4	NA	2.618048097	2.322219295	NA	[132]
Actinopterygii	Clupeiformes	Haemulidae	Parapristipoma trilineatum	fish	35.18	35.18	140.35	Adult	Aquatic	Water	37.2	NA	1.544068044	1.99473576	NA	[133]
Insecta	Hymenoptera	Formicidae	Paratrechina longicornis	insect	33.74	33.74	-92.33	Adult	Terrestrial	Air	46	NA	-3.435728175	1.662757832	NA	[142]
Actinopterygii	Pleuronectiformes	Soleidae	Pegusa lascaris	fish	38.68	38.68	-9.41	Adult	Aquatic	Water	32.9	NA	1.82885316	2.745270024	NA	[142]
Amphibia	Anura	Pelobatidae	Pelobates cultripes	amph	37.78	37.78	-6.08	Non-adult	Aquatic	Water	39	-0.5	-0.263237589	1.880813592	1.913813852	[143]
Amphibia	Anura	Pelobatidae	Pelodytes ibericus	amph	37.66	37.66	-8.26	Non-adult	Aquatic	Water	36.8	-0.5	-0.740447668	1.827369273	1.913813852	[128]
Amphibia	Anura	Pelobatidae	Pelodytes punctatus	amph	38.49	38.49	-2.7	Non-adult	Aquatic	Water	37.6	0.3	-0.69310608	1.847572659	1.754348336	[144]
Amphibia	Anura	Ranidae	Pelophylax perezi	amph	37.78	37.78	-6.08	Non-adult	Aquatic	Water	40.5	2.9	-0.284644405	1.913813852	1.835056102	[125]
Malacostraca	Decapoda	Penaeidae	Penaeus monodon	crust	51.16	51.16	10.2	Adult	Aquatic	Water	41.3	NA	1.948901761	2.575957189	NA	[145]
Actinopterygii	Perciformes	Gobiidae	Periophthalmus kalolo	fish	-5.7	5.7	123.7	Adult	Intertidal	Air	40.7	12.8	0.72427587	1.819543936	1.866287339	[130]
Amphibia	Anura	Hylidae	Phasmahyla spectabilis	amph	-15.41	15.41	-39.54	Non-adult	Aquatic	Water	38.9	4.9	-0.888561448	1.878521796	1.781036939	[126]
Insecta	Hymenoptera	Formicidae	Pheidole dentigula	insect	33.74	33.74	-92.33	Adult	Terrestrial	Air	47.7	NA	-3.301029996	1.693726949	NA	[146]
Insecta	Hymenoptera	Formicidae	Pheidole pallidula	insect	41.3	41.3	2.09	Adult	Terrestrial	Air	40	NA	-4	2	NA	[125]
Reptilia	Squamata	Agamidae	Phrynocephalus frontalis	rept	40.03	40.03	107.01	Adult	Terrestrial	Air	47.4	1.3	0.716003344	1.889861721	2.028571253	[125]
Reptilia	Squamata	Agamidae	Phrynocephalus guinanensis	rept	35.57	35.57	101.08	Adult	Terrestrial	Air	46.6	1.9	0.73239376	1.536558443	2.018700499	[147]
Reptilia	Squamata	Agamidae	Phrynocephalus versicolor	rept	41.45	41.45	106.98	Adult	Terrestrial	Air	47.1	4.8	0.782472624	1.561101384	1.967547976	[127]
Reptilia	Squamata	Agamidae	Phrynocephalus vlangalii	rept	36.57	36.57	101.82	Adult	Terrestrial	Air	46.5	1.4	1.45484486	1.531478917	2.026941628	[127]
Amphibia	Anura	Hylidae	Phyllodytes luteolus	amph	-15.08	15.08	-38.99	Non-adult	Aquatic	Water	40.9	6.1	-1.210489796	1.922206277	1.745074792	[123]
Amphibia	Anura	Phyllomedusidae	Phyllomedusa rohdei	amph	-14.79	14.79	-39.17	Non-adult	Aquatic	Water	41.1	7.1	-0.98481289	1.926342447	1.712649702	[148]
Amphibia	Anura	Leptodactylidae	Physalaemus camacan	amph	-14.59	14.59	-39.06	Non-adult	Aquatic	Water	40.8	6.8	-1.302008259	1.920123326	1.722633923	[146]
Actinopterygii	Characiformes	Characidae	Piaractus brachypomus	fish	30.54	30.54	-87.21	Adult	Aquatic	Water	44.4	10.3	1.08278537	1.672097858	1.491361694	[125]
Actinopterygii	Cypriniformes	Cyprinidae	Pimephales notatus	fish	39.3	39.3	-84.6	Adult	Aquatic	Water	31.3	6.4	0.62324929	1.269512944	1.494154594	[125]
Actinopterygii	Cypriniformes	Cyprinidae	Pimephales promelas	fish	32.83	32.83	-110.71	Adult	Aquatic	Water	36.1	NA	1.340444115	1.744292983	NA	[125]
Insecta	Hymenoptera	Formicidae	Plagiolepis pygmaea	insect	41.3	41.3	2.09	Adult	Terrestrial	Air	48	NA	-3.301029996	2.146128036	NA	[125]
Actinopterygii	Cypriniformes	Cyprinidae	Plagopterus argentissimus	fish	38.86	38.86	-113.92	Adult	Aquatic	Water	39.47	NA	0.525044807	1.780257289	NA	[129]
Reptilia	Squamata	Cordylidae	Platysaurus intermedius	rept	-24.58	24.58	31.18	Adult	Terrestrial	Air	44.8	8.9	1.334453751	1.170261715	1.324282455	[129]
Actinopterygii	Perciformes	Serranidae	Plectropomus leopardus	fish	-14.68	14.68	145.45	Non-adult	Aquatic	Water	38.3	NA	2.653212514	1.72427587	NA	[128]
Reptilia	Squamata	Scincidae	Plestiodon elegans	rept	30.2	30.2	120.2	Adult	Terrestrial	Air	41.9	9.3	1.252853031	1.745074792	1.873901598	[127]
Reptilia	Squamata	Scincidae	Plestiodon gilberti	rept	37	37	-119	Adult	Terrestrial	Air	42.3	7.7	0.679427897	1.348304863	1.089905111	[149]
Amphibia	Caudata	Plethodontidae	Plethodon cinereus	amph	36.9	36.9	-81	Adult	Terrestrial	Air	32.5	NA	-0.050609993	1.322219295	NA	[149]
Amphibia	Caudata	Plethodontidae	Plethodon glutinosus	amph	36.9	36.9	-81	Adult	Terrestrial	Air	33	NA	0.685741739	1.342422681	NA	[149]
Amphibia	Anura	Leptodactylidae	Pleurodema thaul	amph	-40.65	40.65	-72.16	Adult	Terrestrial	Air	37.64	-2.32	0.643452676	1.343408594	1.187520721	[149]
Reptilia	Squamata	Tropiduridae	Plica plica	rept	-1.73	1.73	-51.45	Adult	Terrestrial	Air	41.5	9.3	1.488926566	1.77815125	1.837588438	[149]
Reptilia	Squamata	Lacertidae	Podarcis muralis	rept	51.38	51.38	4.44	Adult	Terrestrial	Air	44.2	8.3	0.679427897	1.068185862	1.383815366	[149]
Actinopterygii	Cyprinodontiformes	Poeciliidae	Poecilia sphenops	fish	17.03	17.03	-96.5	Adult	Aquatic	Water	43	8	0.053078443	0.903089987	1.079181246	[149]
Actinopterygii	Cyprinodontiformes	Poeciliidae	Poecilla reticulata	fish	10.42	10.42	-64.19	Non-adult	Aquatic	Water	40.33	NA	-1.744727495	1.263043983	NA	[149]
Actinopterygii	Cypriniformes	Cyprinidae	Pogonichthys macrolepidotus	fish	38.05	38.05	-121.84	Non-adult	Aquatic	Water	33	6.8	0.397940009	2.113943352	2.105510185	[149]
Entognatha	Poduromorpha	Tomoceridae	Pogonognathellus flavescens	col	-37.91	37.91	144.98	Adult	Terrestrial	Air	38.05	-3.53	-3.086451042	2.557507202	2.231979027	[149]
Insecta	Hymenoptera	Formicidae	Pogonomyrmex rugosus	insect	33.74	33.74	-92.33	Adult	Terrestrial	Air	49.8	NA	-2.330993188	1.72916479	NA	[149]
Insecta	Hymenoptera	Formicidae	Polyrhachis argentosa	insect	-19.21	19.21	146.41	Adult	Terrestrial	Air	53.2	NA	-2.543633967	1.450249108	NA	[149]
Malacostraca	Isopoda	Porcellionidae	Porcellio scaber	crust	-33.97	33.97	18.82	Adult	Terrestrial	Air	45.5	-7.3	-1.189095719	1.792391689	1.950364854	[149]
Malacostraca	Decapoda	Portunidae	Portunus pelagicus	crust	21.27	21.27	39.11	Adult	Aquatic	Water	42.32	11.57	2	1.789580712	1.624797579	[150]
Amphibia	Anura	Eleutherodactylidae	Pristimantis buccinator	amph	-12.56	12.56	-70.1	Adult	Aquatic	Air	32.3	12.7	-0.301029996	1.123851641	0.799340549	[150]
Amphibia	Anura	Eleutherodactylidae	Pristimantis carvalhoi	amph	-12.56	12.56	-70.1	Adult	Aquatic	Air	30.6	8.8	-0.397940009	1.064457989	1.008600172	[146]
Amphibia	Anura	Eleutherodactylidae	Pristimantis danae	amph	-12.56	12.56	-70.1	Adult	Aquatic	Air	29	6.3	0.301029996	1	1.103803721	[127]
Amphibia	Anura	Eleutherodactylidae	Pristimantis lindae	amph	-12.56	12.56	-70.1	Adult	Aquatic	Air	27.1	6	0.397940009	0.908485019	1.113943352	[127]
Amphibia	Anura	Eleutherodactylidae	Pristimantis ockendeni	amph	-12.56	12.56	-70.1	Adult	Aquatic	Air	29.9	7.9	-0.096910013	1.037426498	1.045322979	[128]
Amphibia	Anura	Eleutherodactylidae	Pristimantis platydactylus	amph	-12.56	12.56	-70.1	Adult	Aquatic	Air	28.9	6.8	-0.045757491	0.995635195	1.086359831	[128]
Amphibia	Anura	Eleutherodactylidae	Pristimantis reichlei	amph	-12.56	12.56	-70.1	Adult	Aquatic	Air	31.3	8.2	0.361727836	1.089905111	1.033423755	[129]
Amphibia	Anura	Eleutherodactylidae	Pristimantis salaputium	amph	-12.56	12.56	-70.1	Adult	Aquatic	Air	29.2	7.6	-0.301029996	1.008600172	1.056904851	[129]
Amphibia	Anura	Eleutherodactylidae	Pristimantis toftae	amph	-12.56	12.56	-70.1	Adult	Aquatic	Air	30.2	7.2	-0.096910013	1.049218023	1.071882007	[128]
Malacostraca	Decapoda	Cambaridae	Procambarus clarkii	crust	36.44	36.44	-115.36	Adult	Aquatic	Water	36	8.4	1.342422681	1.84509804	1.484299839	[127]
Actinopterygii	Characiformes	Prochilodontidae	Prochilodus lineatus	fish	-22	22	-47.42	Adult	Aquatic	Water	42.62	6.53	2.396199347	1.881954971	1.92788341	[151]
Reptilia	Squamata	Viperidae	Protobothrops mucrosquamatus	rept	24.94	24.94	121.43	Adult	Terrestrial	Air	38.6	3.5	1.042969073	1.536558443	1.414973348	[125]
Reptilia	Squamata	Lacertidae	Psammodromus algirus	rept	51.38	51.38	4.44	Adult	Terrestrial	Air	43.5	7	1.042969073	1.041392685	1.40654018	[123]
Reptilia	Squamata	Lacertidae	Psammodromus hispanicus hispanicus	rept	51.38	51.38	4.44	Adult	Terrestrial	Air	45.5	8.8	0.155336037	1.113943352	1.374748346	[127]
Amphibia	Anura	Hylidae	Pseudacris crucifer crucifer	amph	41.56	41.56	-80.45	Non-adult	Aquatic	Water	39.4	NA	-0.860435734	2.588831726	NA	[135]
Actinopterygii	Clupeiformes	Carangidae	Pseudocaranx dentex	fish	35.18	35.18	140.35	Adult	Aquatic	Water	36.1	NA	1.447158031	1.932180256	NA	[143]
Actinopterygii	Perciformes	Cichlidae	Pseudocrenilabrus multicolor	fish	-0.27	0.27	31.86	Adult	Aquatic	Water	41.1	NA	0.33243846	1.481920138	NA	[152]
Amphibia	Anura	Craugastoridae	Psychrophrynella usurpator	amph	-12.56	12.56	-70.1	Adult	Aquatic	Air	28.2	2.9	-0.045757491	0.963787827	1.206825876	[153]
Actinopterygii	Scorpaeniformes	Scorpaenidae	Pterois volitans	fish	27.74	27.74	-78.71	Adult	Aquatic	Water	37.3	NA	2.234010818	1.20576193	NA	[128]
Insecta	Plecoptera	Pteronarcyidae	Pteronarcys dorsata	insect	44.02	44.02	-85.63	Non-adult	Aquatic	Water	36.6	NA	-2.602059991	1.403019534	NA	[146]
Actinopterygii	Perciformes	Cichlidae	Pterophyllum scalare	fish	19.32	19.32	-99.18	Adult	Aquatic	Water	41.2	NA	0.716003344	0.963787827	NA	[129]
Insecta	Hymenoptera	Apidae	Ptilothrix bombiformis	insect	35.8	35.8	-76.68	Adult	Terrestrial	Air	47.82	NA	-0.952923828	1.659345636	NA	[125]
Actinopterygii	Characiformes	Lebisianidae	Pyrrhulina brevis	fish	-2.88	2.88	-59.96	Adult	Aquatic	Water	36.21	NA	0.334453751	2.84548563	NA	[154]
Amphibia	Anura	Ranidae	Rana cascadae	amph	44.48	44.48	-121.99	Non-adult	Aquatic	Water	37.8	NA	-0.413525221	2.551449998	NA	[154]
Amphibia	Anura	Ranidae	Rana luteiventris	amph	46.73	46.73	-116.92	Non-adult	Aquatic	Water	37.9	NA	-0.469800302	2.553883027	NA	[155]
Amphibia	Anura	Ranidae	Rana sphenocephala utricularia	amph	34.91	34.91	-76.98	Non-adult	Aquatic	Water	40.1	NA	-0.630042393	2.604226053	NA	[155]
Amphibia	Anura	Ranidae	Rana temporaria temporaria	amph	43.38	43.38	-4.81	Non-adult	Terrestrial	Water	34.8	-1.5	-0.455931956	1.772321707	1.892094603	[154]
Amphibia	Anura	Ranidae	Rana virgatipes	amph	39.86	39.86	-74.69	Adult	Terrestrial	Air	38	NA	0.84509804	1.381549592	NA	[155]
Actinopterygii	Osmeriformes	Retropinnidae	Retropinna retropinna	fish	-37.97	37.97	175.65	Adult	Aquatic	Water	33.8	NA	0.539950494	0.895790748	NA	[155]
Amphibia	Anura	Bufonidae	Rhinella crucifer	amph	-15.42	15.42	-39.54	Non-adult	Aquatic	Water	41.8	4.3	-1.281379698	1.940516485	1.797959644	[155]
Amphibia	Anura	Bufonidae	Rhinella hoogmoedi	amph	-14.58	14.58	-39.06	Non-adult	Aquatic	Water	39.4	8.2	-0.690495649	1.889861721	1.673941999	[155]
Amphibia	Anura	Bufonidae	Rhinella jimi	amph	-13.97	13.97	-41.11	Non-adult	Aquatic	Water	42.6	6	-0.812831934	1.95616843	1.748188027	[155]
Amphibia	Anura	Bufonidae	Rhinella spinulosa	amph	-22.89	22.89	-68.21	Adult	Terrestrial	Water	38.11	-1.01	1.431363764	1.178737204	0.962606073	[154]
Actinopterygii	Cypriniformes	Cyprinidae	Rhinichthys osculus	fish	42.86	42.86	-109.86	Adult	Aquatic	Water	34.9	NA	0.986771734	1.244414578	NA	[154]
Insecta	Ephemeroptera	Heptageniidae	Rhitrogena semicolorata	insect	50.4	50.4	-4.28	Non-adult	Aquatic	Water	32	NA	-1.863279433	1.944482672	NA	[154]
Amphibia	Caudata	Rhyacotritonidae	Rhyacotriton variegatus	amph	44.5	44.5	-123.55	Adult	Terrestrial	Air	29.3	NA	0.041392685	1.484299839	NA	[155]
Insecta	Hymenoptera	Formicidae	Rhytidoponera impressa	insect	-19.21	19.21	146.41	Adult	Terrestrial	Air	45.57142857	NA	-2.188042206	1.313264452	NA	[154]
Amphibia	Caudata	Salamandridae	Salamandra salamandra salamandra	amph	37.91	37.91	-6.56	Non-adult	Aquatic	Water	35.3	-0.9	-0.473079467	1.786751422	1.922206277	[154]
Actinopterygii	Salmoniformes	Salmonidae	Salmo salar	fish	54.24	54.24	-3	Non-adult	Aquatic	Water	32.9	NA	1.041392685	2.633468456	NA	[155]
Actinopterygii	Salmoniformes	Salmonidae	Salmo trutta	fish	33.93	33.93	-109.58	Non-adult	Aquatic	Water	29.9	NA	1.730782276	2.694605199	NA	[154]
Actinopterygii	Salmoniformes	Salmonidae	Salvelinus fontinalis	fish	33.93	33.93	-109.58	Non-adult	Aquatic	Water	29.8	NA	1.754042387	2.69019608	NA	[156]
Insecta	Coleoptera	Scarabaeidae	Scarabaeus zambezianus	insect	-20.46	20.46	24.51	Adult	Terrestrial	Air	47.33	5.22	-0.032849997	1.91019737	1.940117867	[154]
Actinopterygii	Perciformes	Blenniidae	Scartella cristata	fish	-23.83	23.83	-45.44	Non-adult	Intertidal	Water	38.53	NA	0.11058971	2.036761931	NA	[157]
Actinopterygii	Perciformes	Scatophagidae	Scatophagus argus	fish	11.48	11.48	79.78	Adult	Aquatic	Water	42.5	NA	0.653212514	1.161368002	NA	[157]
Reptilia	Squamata	Phrynosomatidae	Sceloporus malachiticus	rept	10.16	10.16	-84.8	Adult	Terrestrial	Air	42.8	9.7	0.633468456	1.10720997	1.307496038	[157]
Reptilia	Squamata	Phrynosomatidae	Sceloporus occidentalis	rept	33.91	33.91	-115.9	Adult	Terrestrial	Air	44.1	4.6	0.723455672	1.149219113	1.404833717	[157]
Reptilia	Squamata	Phrynosomatidae	Sceloporus undulatus	rept	33.34	33.34	-81.73	Adult	Terrestrial	Air	40.4	11.4	1.041392685	0.73239376	0.556302501	[158]
Reptilia	Squamata	Phrynosomatidae	Sceloporus variabilis	rept	10.5	10.5	-84	Adult	Terrestrial	Air	43.1	10.2	1.015359755	1.117271296	1.29666519	[158]
Actinopterygii	Perciformes	Sciaenidae	Sciaenops ocellatus	fish	30.28	30.28	-97.73	Adult	Aquatic	Water	41.5	NA	1.562292864	2.583576586	NA	[158]
Amphibia	Anura	Hylidae	Scinax agilis	amph	-14.66	14.66	-39.07	Non-adult	Aquatic	Water	42.5	7.3	-0.682045616	1.954242509	1.705863712	[157]
Amphibia	Anura	Hylidae	Scinax eurydice	amph	-14.6	14.6	-39.06	Non-adult	Aquatic	Water	42.4	6.8	-0.568580561	1.95230801	1.722633923	[157]
Amphibia	Anura	Hylidae	Scinax strigilatus	amph	-14.58	14.58	-39.06	Non-adult	Aquatic	Water	38.3	6.2	-0.885132508	1.864511081	1.741939078	[154]
Actinopterygii	Scorpaeniformes	Sebastidae	Sebastes schlegelii	fish	35.18	35.18	140.35	Adult	Aquatic	Water	34.6	NA	1.255272505	1.900465843	NA	[154]
Actinopterygii	Scorpaeniformes	Sebastidae	Sebastiscus marmoratus	fish	34.98	34.98	138.36	Adult	Aquatic	Water	32.8	4.9	1.025305865	1.989004616	2.101231387	[155]
Actinopterygii	Cypriniformes	Cyprinidae	Semotilus atromaculatus	fish	39.5	39.5	-91.5	Adult	Aquatic	Water	35.7	NA	0.744292983	2.756322813	NA	[154]
Insecta	Ephemeroptera	Ephemerellidae	Serratella ignita	insect	50.91	50.91	-4.07	Non-adult	Aquatic	Water	35.45	NA	-2.346787486	2.007747778	NA	[154]
Actinopterygii	Perciformes	Siganidae	Siganus javus	fish	11.48	11.48	79.78	Adult	Aquatic	Water	39.5	NA	0.653212514	1.06069784	NA	[159]
Insecta	Hemiptera	Corixidae	Sigara lateralis	insect	36.95	36.95	-6.43	Adult	Aquatic	Air	46.6	-7.2	-2.454041189	1.563481085	1.235528447	[155]
Actinopterygii	Clupeiformes	Sillaginidae	Sillago japonica	fish	35.18	35.18	140.35	Adult	Aquatic	Water	37.4	NA	2.053078443	2.054049761	NA	[154]
Actinopterygii	Cypriniformes	Cyprinidae	Siphateles bicolor	fish	35.65	35.65	-117.66	Adult	Aquatic	Water	36.2	2.8	1.252853031	1.646263654	2.035715552	[154]
Insecta	Hymenoptera	Formicidae	Solenopsis invicta	insect	33.57	33.57	-101.89	Adult	Terrestrial	Air	46.46	NA	-4.503070352	1.266231697	NA	[154]
Amphibia	Anura	Hylidae	Sphaenorhynchus prasinus	amph	-14.79	14.79	-39.17	Non-adult	Aquatic	Water	41.3	5.8	-0.76812774	1.930439595	1.754348336	[160]
Reptilia	Squamata	Scincidae	Sphenomorphus incognitus	rept	22.12	22.12	120.95	Adult	Terrestrial	Air	41.5	11.6	1.230448921	1.185636577	0.656417654	[161]
Reptilia	Squamata	Scincidae	Sphenomorphus indicus	rept	30.2	30.2	119.24	Adult	Terrestrial	Air	37.6	3.1	0.959041392	1.584331224	1.998259338	[161]
Reptilia	Squamata	Scincidae	Sphenomorphus taiwanensis	rept	24.1	24.1	121.3	Adult	Terrestrial	Air	38.4	4.9	1.741151599	1.049218023	0.832508913	[161]
Actinopterygii	Tetraodontiformes	Tetraodontidae	Sphoeroides annulatus	fish	29.06	29.06	-110.95	Adult	Aquatic	Water	41.3	NA	0.809559715	1.012837225	NA	[154]
Insecta	Hymenoptera	Formicidae	Stenamma brevicorne	insect	33.74	33.74	-92.33	Adult	Terrestrial	Air	44.5	NA	-3.198367882	1.633468456	NA	[162]
Reptilia	Squamata	Lacertidae	Takydromus formosanus	rept	25.09	25.09	121.56	Adult	Terrestrial	Air	43.3	4.5	0.62838893	1.248790378	0.865301426	[163]
Reptilia	Squamata	Lacertidae	Takydromus hsuehshanensis	rept	23.84	23.84	120.99	Adult	Terrestrial	Air	44.1	2.1	0.85672889	1.274157849	1.022565828	[163]
Reptilia	Squamata	Lacertidae	Takydromus septentrionalis	rept	29.93	29.93	121.85	Adult	Terrestrial	Air	44.4	4.9	0.342422681	1.575187845	1.781036939	[163]
Reptilia	Squamata	Lacertidae	Takydromus sexlineatus	rept	24.8	24.8	113.57	Adult	Terrestrial	Air	42.2	6.4	0.439332694	1.754348336	1.936513742	[164]
Reptilia	Squamata	Lacertidae	Takydromus stejnegeri	rept	25.09	25.09	121.56	Adult	Terrestrial	Air	43.7	5.2	0.67669361	1.261659304	0.806179974	[165]
Actinopterygii	Perciformes	Terapontidae	Terapon jarbua	fish	11.48	11.48	79.78	Adult	Aquatic	Water	42	NA	0.653212514	1.146128036	NA	[166]
Insecta	Odonata	Corduliidae	Tetragoneuria cynosura	insect	33.19	33.19	-81.75	Non-adult	Aquatic	Water	40.96	NA	-2.460923901	0.651278014	NA	[154]
Insecta	Hymenoptera	Formicidae	Tetramorium semilaeve	insect	41.3	41.3	2.09	Adult	Terrestrial	Air	40	NA	-3.096910013	2	NA	[159]
Actinopterygii	Perciformes	Labridae	Thalassoma lucasanum	fish	2.96	2.96	-78.18	Adult	Aquatic	Water	36	16.4	0.643452676	2.977723605	3.004321374	[167]
Reptilia	Squamata	Phyllodactylidae	Thecadactylus rapicauda	rept	-2.95	2.95	-59.91	Adult	Terrestrial	Air	38.4	3.1	1.380211242	1.677606953	1.971275849	[159]
Actinopterygii	Salmoniformes	Salmonidae	Thymallus arcticus	fish	45.65	45.65	-112.9	Non-adult	Aquatic	Water	29.3	NA	1.290034611	1.366422957	NA	[159]
Reptilia	Squamata	Scincidae	Tiliqua rugosa	rept	-32.62	32.62	138	Adult	Terrestrial	Air	43	3.5	1.342422681	0.903089987	1.498310554	[155]
Actinopterygii	Cypriniformes	Cyprinidae	Tor putitora	fish	29.36	29.36	79.55	Non-adult	Aquatic	Water	41.8	NA	1.134177108	1.514104821	NA	[155]
Reptilia	Testudines	Emydidae	Trachemys scripta elegans	rept	30.31	30.31	120.41	Non-adult	Aquatic	Air	43.05	1.22	0.620136055	2.147676324	2.443732241	[168]
Actinopterygii	Clupeiformes	Carangidae	Trachurus japonicus	fish	35.18	35.18	140.35	Adult	Aquatic	Water	35.1	NA	1.477121255	1.932180256	NA	[155]
Amphibia	Anura	Hylidae	Trachycephalus mesophaeus	amph	-14.79	14.79	-39.17	Non-adult	Aquatic	Water	41	8.2	-0.371538085	1.924279286	1.673941999	[169]
Actinopterygii	Perciformes	Nototheniidae	Trematomus bernacchii	fish	-77.49	77.49	165	Adult	Aquatic	Water	15	NA	1.903089987	1.56427143	NA	[170]
Actinopterygii	Perciformes	Nototheniidae	Trematomus hansoni	fish	-77.49	77.49	165	Adult	Aquatic	Water	15.4	NA	2.228656958	1.579783597	NA	[169]
Actinopterygii	Perciformes	Nototheniidae	Trematomus pennellii	fish	-77.49	77.49	165	Adult	Aquatic	Water	15.4	NA	1.873320602	1.579783597	NA	[171]
Reptilia	Squamata	Gymnophthalmidae	Tretioscincus agilis	rept	-2.95	2.95	-59.91	Adult	Terrestrial	Air	40.2	9.3	0.611014834	1.738780558	1.837588438	[171]
Actinopterygii	Perciformes	Gobiidae	Tridentiger bifasciatus	fish	38.15	38.15	-122.05	Adult	Intertidal	Water	37	NA	0.880813592	1.929418926	NA	[172]
Reptilia	Squamata	Viperidae	Trimeresurus stejnegeri	rept	24.94	24.94	121.43	Adult	Terrestrial	Air	38.9	5.6	1.195899652	1.551449998	1.245512668	[173]
Amphibia	Caudata	Salamandridae	Triturus dobrogicus	amph	46.89	46.89	19.44	Adult	Terrestrial	Air	37.9	NA	0.929418926	1.411619706	NA	[171]
Reptilia	Squamata	Tropiduridae	Tropidurus hispidus	rept	-0.91	0.91	-51.6	Adult	Terrestrial	Air	41.5	9.3	1.550155272	1.77815125	1.837588438	[154]
Malacostraca	Decapoda	Ocypodidae	Uca panacea	crust	27.88	27.88	-97.11	Adult	Terrestrial	Air	45.12	9.07	0.204119983	1.528059258	1.561498907	[157]
Malacostraca	Decapoda	Ocypodidae	Uca pugilator	crust	32.01	32.01	-80.88	Adult	Terrestrial	Air	43	NA	0.301029996	1.77815125	NA	[160]
Reptilia	Squamata	Tropiduridae	Uranoscodon superciliosus	rept	-9.93	9.93	-49.78	Adult	Terrestrial	Air	43.1	13.2	1.31936635	1.822168079	1.725911632	[154]
Reptilia	Squamata	Xantusiidae	Xantusia riversiana	rept	32.89	32.89	-118.49	Adult	Terrestrial	Air	39	6.6	1.312177356	0.865301426	1.154322514	[167]
Reptilia	Squamata	Xantusiidae	Xantusia vigilis	rept	33.91	33.91	-115.9	Adult	Terrestrial	Air	41.6	6.9	0.619093331	1.064457989	1.36361198	[154]
Actinopterygii	Cyprinodontiformes	Poeciliidae	Xiphophorus maculatus	fish	-25	25	-49	Non-adult	Aquatic	Water	41.5	9.6	0.041392685	1.963787827	1.635483747	[154]
Insecta	Hymenoptera	Apidae	Xylocopa virginica virginica	insect	35.8	35.8	-76.68	Adult	Terrestrial	Air	49.81	NA	-0.168422975	1.69565676	NA	[174]
Actinopterygii	Perciformes	Zoarcidae	Zoarces viviparus	fish	58.32	58.32	20.1	Adult	Aquatic	Water	26.6	NA	1.676053125	1.164352856	NA	[155]
